# Supplementary material for: Synthesis of 1,2,4-oxadiazolidines via [3+2] cycloaddition of nitrones with carbodiimides
Source: Royal Society of Chemistry journal article supplement (doi:10.1039/c9nj00030e), 2019-01-01

*New Journal of Chemistry*

**Synthesis of 1,2,4-Oxadiazolidines via [3+2] Cycloaddition of  
Nitrones with Carbodiimides**

**Supporting information**

Yuan Chen,<sup>a, †</sup> Liuting Fuyue,<sup>a, †</sup> Gangqiang Wang,<sup>a, †</sup> Hang Wang,<sup>a</sup> Chun Lu,<sup>a</sup> Haibing Guo,<sup>a</sup>  
Chiara St. Amant,<sup>b</sup> Shaofa Sun <sup>\*a</sup> and Yalan Xing <sup>\*b</sup>

**Content**

|                                    |    |
|------------------------------------|----|
| 1 General information .....        | 2  |
| 2.1 General procedure A .....      | 2  |
| 2.2 General procedure A .....      | 2  |
| 2.3 General Procedure B .....      | 3  |
| 3 Structure characterization ..... | 3  |
| 4 NMR spectra .....                | 9  |
| 5 X-Ray diffraction of.....        | 38 |

a. Non-power Nuclear Technology Collaborative Innovation Center, School of Nuclear Technology and Chemistry & Biology, Hubei University of Science and Technology, Xianning 437100, ChinaAddress

b. Department of Chemistry, William Paterson University of New Jersey, 300 Pompton Road, Wayne, NJ 07470, US

<sup>†</sup> These three authors contributed equally to the work

## 1 General Information

All reactions were carried out under an atmosphere of nitrogen in oven-dried glassware with magnetic stirring, unless otherwise specified. Dichloromethane was purified by passage through a bed of activated alumina. All other reagents and solvents were purchased from Sigma-Aldrich or J&K Chemical Company and used without any further purification. TLC information was recorded on GF 254 (Qingdao Haiyang Chemical Co., Ltd. P. R. China) plates and developed by staining with  $\text{KMnO}_4$  or ceric ammonium molybdate (CAM). Purification of reaction products was carried out by flash chromatography using Silica gel (200 - 300 mesh, Qingdao Haiyang Chemical Co. Ltd. P. R. China).  $^1\text{H}$  NMR spectra were measured on Varian 400 (400 MHz), spectrometers and are reported in ppm (s=singlet, d=doublet, t=triplet, q=quartet, m=multiplet, br=broad; integration; coupling constant(s) in Hz), using TMS as an internal standard (TMS at 0.00 ppm) in  $\text{CDCl}_3$ .  $^{13}\text{C}$  NMR spectra were recorded on V400 spectrometer and reported in ppm using solvent as an internal standard ( $\text{CDCl}_3$  at 77.16 ppm). High-resolution mass spectra were obtained using an Agilent 6230 TOF LC/MS with an (atmospheric pressure photo-ionization (APPI) or electrospray (ESI) source with purine and HP-0921 as an internal calibrants. HRMS (EI) was performed on an API-Qstar-Pulsar-1 spectrometer. Melting points were determined on a digital melting-point apparatus and uncorrected.

## 2.2 General procedure A for the synthesis of nitrones

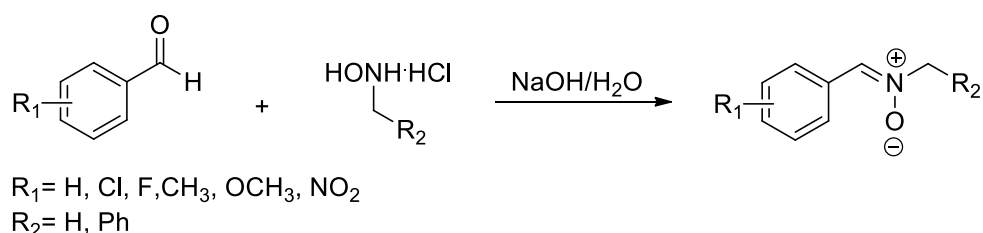

To a solution of hydroxylamine hydrochloride (1.0 mmol) in the water (2.0 mL) was added aldehyde (1.0 mmol) and NaOH (1.0 mmol), the reaction mixture was stirred at room temperature until completion, the aqueous phase extracted with  $\text{CH}_2\text{Cl}_2$  (3 x 10 mL). The combined organic phase was dried over  $\text{MgSO}_4$  and concentrated in vacuo to give nitrones.

## 2.2 General procedure B for the synthesis of carbodiimides

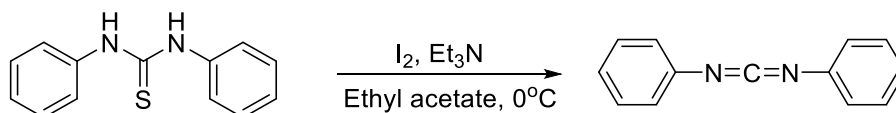

To a stirred and ice-cooled solution of 1,3-diphenylthiourea (2 mmol) in ethyl acetate (5 mL), was added triethylamine (4 mmol). To this was added iodine (2.2 mmol) portion-wise over a period of 30 min. A light yellow colour precipitate of sulfur started separating out during this period. The precipitated sulfur was filtered, the organic layer evaporated and then extracted with hexane (3 x 10 mL). The solution was concentrated under reduced pressure and purified by eluting through a short column of silica gel (100% hexane) to give oily carbodiimide (80%).

### 2.3 General procedure C for the [3+2]-cycloaddition of nitrones with carbodiimides:

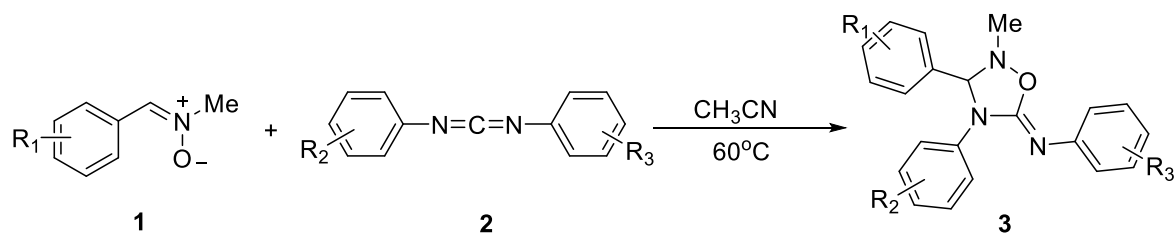

To a solution of nitrones **1** (1.5 mmol) in  $CH_3CN$  (2.0 mL) was added carbodiimide **2** (1.0 mmol.) and stirred at  $60^\circ C$  and the reaction progress monitored by TLC (hexane : ethyl acetate = 10:1) until complete consumption of the carbodiimide (reaction time: see substrate tables). The mixture was filtered through the short pad of celite and the filtrate was concentrated under reduced pressure. The residue was purified via flash column chromatography (hexane : ethyl acetate = 100:1 to 20:1) to provide the desired cycloadducts.

### 2.1 Optimization of reaction conditions (Table 1)

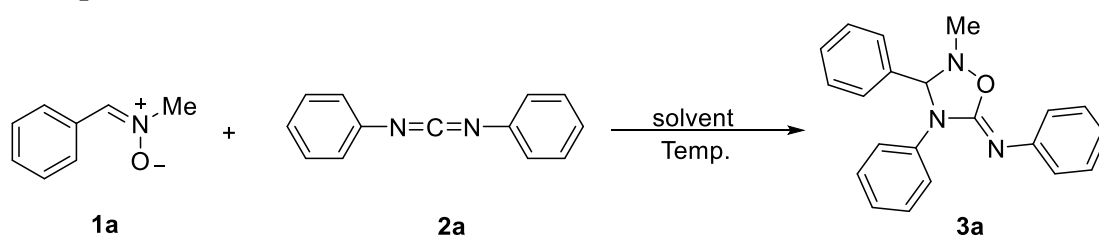

| Entry <sup>a</sup> | Solvent      | T/ <sup>o</sup> C | T/h | Yilde <sup>b</sup> |
|--------------------|--------------|-------------------|-----|--------------------|
| 1                  | $CH_3CN$     | 110               | 4   | 40%                |
| 2                  | $CH_3CN$     | 80                | 4   | 56%                |
| 3                  | $CH_3CN$     | 60                | 4   | 89%                |
| 4                  | $CH_3CN$     | 50                | 4   | 64%                |
| 5                  | $CH_3CN$     | r.t.              | 24  | 24%                |
| 6                  | Tol.         | 60                | 24  | 50%                |
| 7                  | DMF          | 60                | 24  | <5%                |
| 8                  | DMSO         | 60                | 24  | <5%                |
| 9                  | 1,4-dioxane  | 60                | 4   | 69%                |
| 10                 | $CH_3CH_2OH$ | 60                | 24  | <5%                |
| 11                 | $CH_3OH$     | r.t.              | 24  | <5%                |
| 12                 | $CH_3CO_2Et$ | r.t.              | 24  | <5%                |
| 13                 | DCM          | r.t.              | 24  | <5%                |
| 14                 | THF          | r.t.              | 24  | <5%                |

a Reaction conditions: a mixture of **1a** (1.5 mmol), **2a** (1.0 mmol) in solvent (2 mL) was stirred at the setting temperature for a certain period of time.

b Yield of isolated product.

**Table 2.** Scope of nitrones.<sup>a</sup>

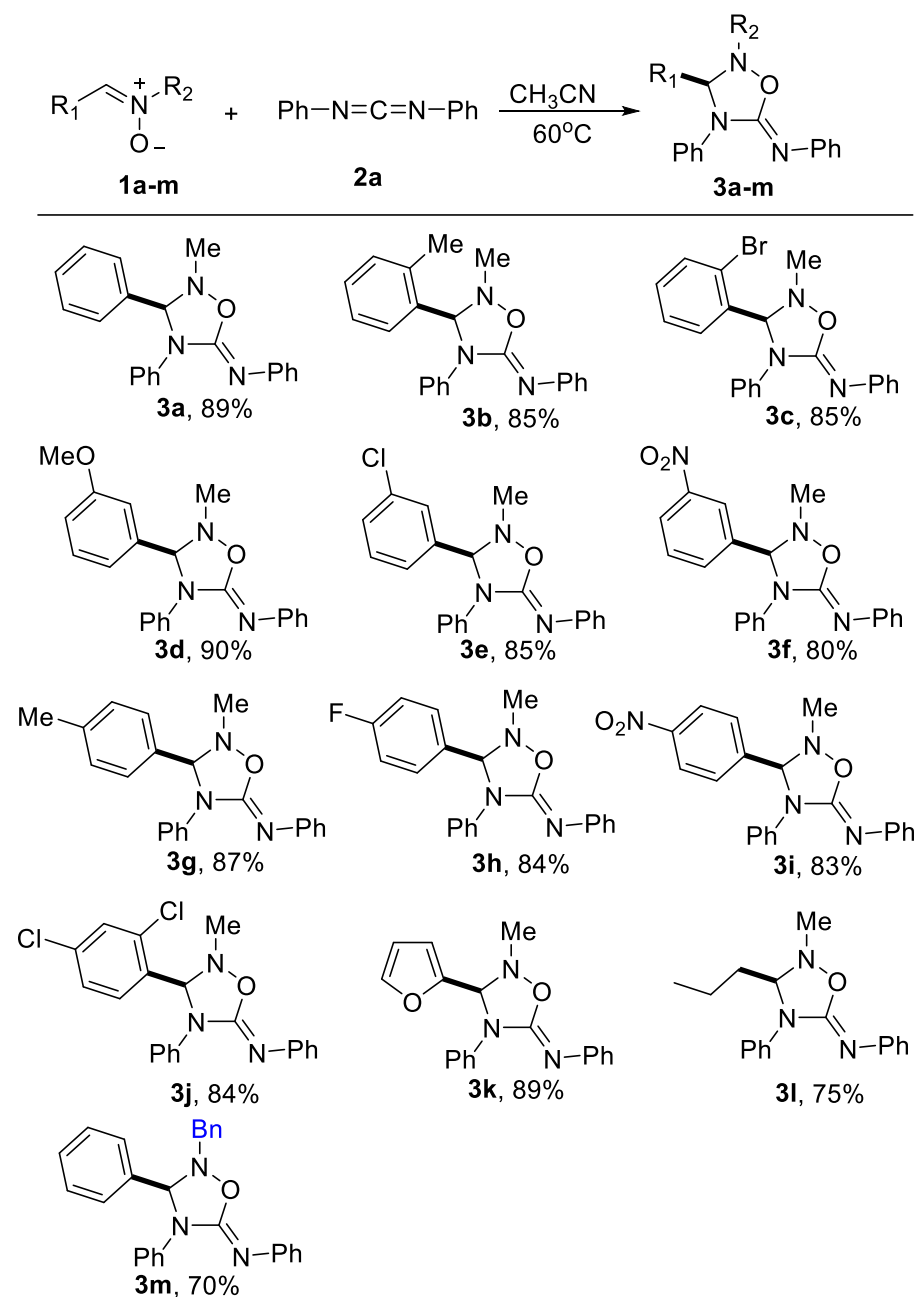

**Table 3.** Scope of carbodiimides.<sup>a</sup>

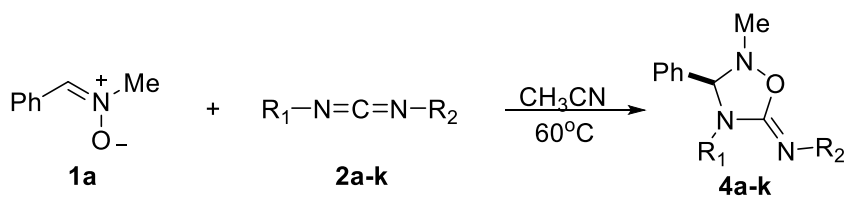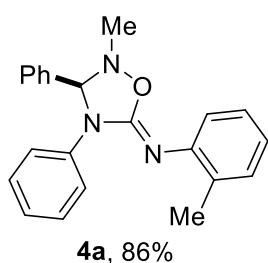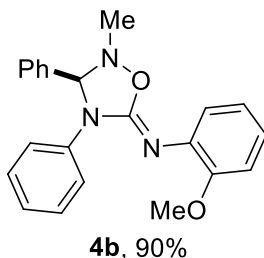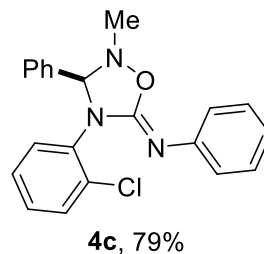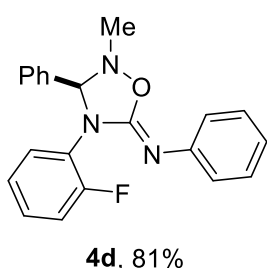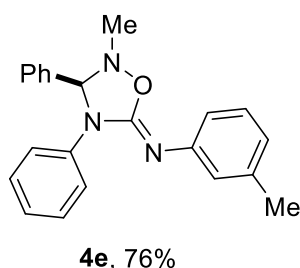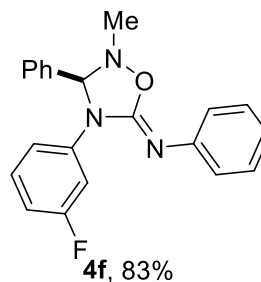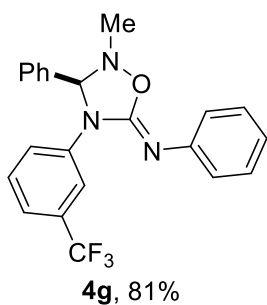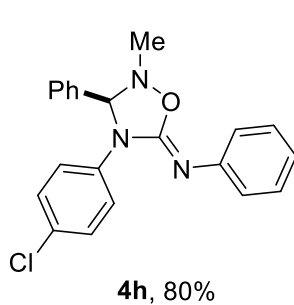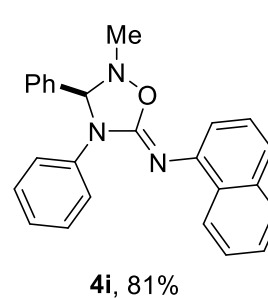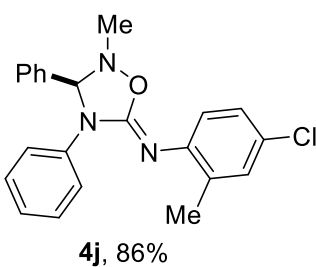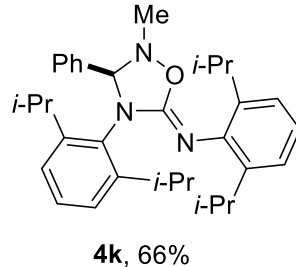

### 3. Structure characterization

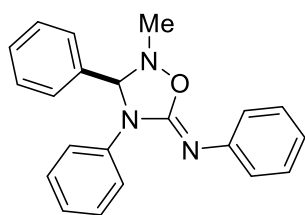

(*R,Z*)-2-methyl-*N*,3,4-triphenyl-1,2,4-oxadiazolidin-5-imine (**3a**)

White solid, m. p. 78-80°C, 89% yield. Reaction time 4h. <sup>1</sup>HNMR (400 MHz, CDCl<sub>3</sub>): δ 7.60-7.58 (m, 2H), 7.48-7.40 (m, 5H), 7.35-7.31 (m, 4H), 7.30-7.28 (m, 2H), 7.21-7.03 (m, 2H), 5.60 (s, 1H), 3.06 (s, 3H); <sup>13</sup>C NMR (100MHz, CDCl<sub>3</sub>): δ 147.6, 146.1, 138.2, 136.2, 129.6, 129.0, 128.6, 127.1, 124.1, 123.5, 122.9, 120.7,

85.1, 45.9. HRMS (EI) *m/z* 352.1428 [M+Na]<sup>+</sup> (calcd for C<sub>21</sub>H<sub>19</sub>N<sub>3</sub>ONa 352.1426).

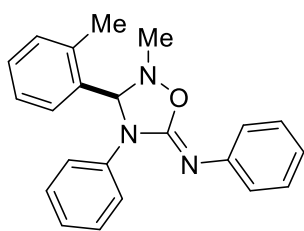

(*R,Z*)-2-methyl-*N*,4-diphenyl-3-(*o*-tolyl)-1,2,4-oxadiazolidin-5-imine (**3b**)

White solid, m. p. 84-85°C, 85% yield. Reaction time 4h. <sup>1</sup>H NMR (400 MHz, CDCl<sub>3</sub>): δ 7.61-7.59 (m, 2H), 7.36-7.28 (m, 7H), 7.24-7.03 (m, 5H), 5.83 (s, 1H), 3.07 (s, 3H), 2.47 (s, 3H); <sup>13</sup>C NMR (100 MHz, CDCl<sub>3</sub>): δ 146.0, 138.4, 136.3, 133.8, 131.3, 129.3, 129.0, 128.6, 125.9, 123.7, 123.6, 123.0, 119.5, 82.2, 46.1, 19.2. HRMS (EI) *m/z* 366.1584 [M+Na]<sup>+</sup> (calcd for C<sub>22</sub>H<sub>21</sub>N<sub>3</sub>ONa 366.1582).

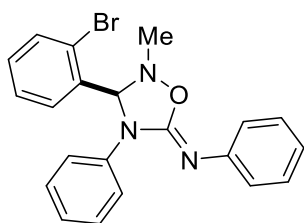

(*R,Z*)-3-(2-bromophenyl)-2-methyl-*N*,4-diphenyl-1,2,4-oxadiazolidin-5-imine (**3c**)

Colorless oil, 85% yield. Reaction time 4h. <sup>1</sup>H NMR (400 MHz, CDCl<sub>3</sub>): δ 7.71-7.62 (m, 3H), 7.42-7.21 (m, 8H), 7.13-7.04 (m, 2H), 6.09 (s, 1H), 3.15 (s, 3H); <sup>13</sup>C NMR (100 MHz, CDCl<sub>3</sub>): δ 147.5, 145.8, 138.1, 133.6, 130.9, 129.1, 128.6, 128.2, 127.6, 123.8, 123.6, 123.5, 123.1, 119.2, 83.1, 46.5. HRMS (EI) *m/z* 430.0531 [M+Na]<sup>+</sup> (calcd for C<sub>21</sub>H<sub>18</sub>N<sub>3</sub>ONa 430.0531).

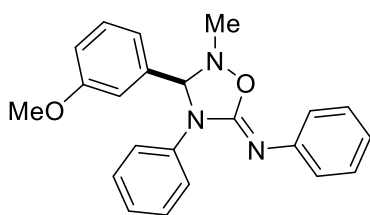

(*R,Z*)-3-(3-methoxyphenyl)-2-methyl-*N*,4-diphenyl-1,2,4-oxadiazolidin-5-imine (**3d**)

White solid, m. p. 75-77°C, 90% yield. Reaction time 4h. <sup>1</sup>H NMR (400 MHz, CDCl<sub>3</sub>): δ 7.60-7.58 (m, 2H), 7.35-7.19 (m, 5H), 7.13-6.92 (m, 7H), 5.57 (s, 1H), 3.81 (s, 3H), 3.06 (s, 3H); <sup>13</sup>C NMR (100 MHz, CDCl<sub>3</sub>): δ 160.1, 146.1, 138.2, 130.1, 129.0, 128.6, 124.2, 123.5, 122.9, 120.8, 119.4, 115.2, 112.5, 85.1, 55.3, 45.9. HRMS (EI) *m/z* 382.1531 [M+Na]<sup>+</sup> (calcd for C<sub>22</sub>H<sub>21</sub>N<sub>3</sub>O<sub>2</sub>Na 382.1531).

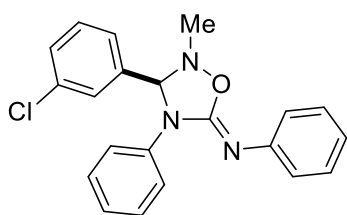

(*R,Z*)-3-(3-chlorophenyl)-2-methyl-*N*,4-diphenyl-1,2,4-oxadiazolidin-5-imine (**3e**)

White solid, m. p. 74-76°C, 85% yield. Reaction time 4h. <sup>1</sup>H NMR (400 MHz, CDCl<sub>3</sub>): δ 7.59-7.57 (m, 2H), 7.47 (s, 1H), 7.40-7.28 (m, 7H), 7.19-7.04 (m, 4H), 5.58 (s, 1H), 3.06 (s, 3H); <sup>13</sup>C NMR (100 MHz, CDCl<sub>3</sub>): δ 147.2, 146.1, 138.0, 135.0, 130.3, 129.8, 129.2, 128.6, 127.4, 125.1, 124.4, 123.5, 123.5, 123.1, 120.5, 84.3, 46.0. HRMS (EI) *m/z* 386.1034 [M+Na]<sup>+</sup> (calcd for C<sub>21</sub>H<sub>18</sub>ClN<sub>3</sub>ONa 386.1036).

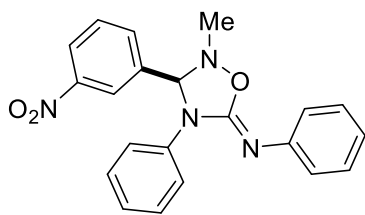

(*R,Z*)-2-methyl-3-(3-nitrophenyl)-*N*,4-diphenyl-1,2,4-oxadiazolidin-5-imine (**3f**)

White solid, m. p. 84-86°C, 80% yield. Reaction time 4h. <sup>1</sup>H NMR (400 MHz, CDCl<sub>3</sub>): δ 8.37-8.36 (m, 1H), 8.29-8.26 (m, 1H), 7.78-7.76 (m, 1H), 7.62-7.58 (m, 3H), 7.39-7.29 (m, 4H), 7.19-7.07 (m, 4H), 5.74 (s, 1H), 3.10 (s, 3H); <sup>13</sup>C NMR (100 MHz, CDCl<sub>3</sub>): δ 148.6, 145.6, 137.8, 132.8, 130.2, 129.4, 128.7, 124.7, 123.4, 123.3, 122.6, 120.5, 83.6, 29.7. HRMS (EI) *m/z*

397.1274 [M+Na]<sup>+</sup> (calcd for C<sub>21</sub>H<sub>18</sub>N<sub>4</sub>O<sub>3</sub>Na 397.1277).

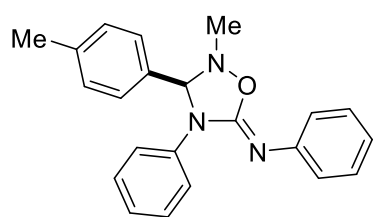

(R,Z)-2-methyl-N,4-diphenyl-3-(p-tolyl)-1,2,4-oxadiazolidin-5-imine(**3g**)

White solid, m. p. 71-73°C, 87% yield. Reaction time 4h. <sup>1</sup>H NMR (400 MHz, CDCl<sub>3</sub>): δ 7.59-7.57 (d, 2H, *J* = 8.0 Hz), 7.36-7.30 (m, 6H), 7.22-7.18 (m, 4H), 7.12-7.03 (m, 2H), 5.56 (s, 1H), 3.03 (s, 3H), 2.37 (s, 3H); <sup>13</sup>C NMR (100 MHz, CDCl<sub>3</sub>): δ 146.2, 139.6, 138.2, 129.7, 128.9, 128.6, 127.1, 124.1, 123.6, 122.9, 120.8, 85.1, 45.7, 21.3. HRMS (EI) *m/z* 366.1580 [M+Na]<sup>+</sup> (calcd for C<sub>22</sub>H<sub>21</sub>N<sub>3</sub>ONa 366.1582).

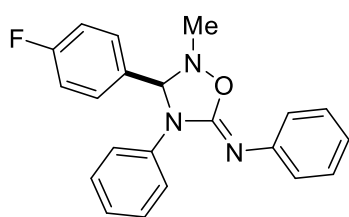

(R,Z)-3-(4-fluorophenyl)-2-methyl-N,4-diphenyl-1,2,4-oxadiazolidin-5-imine(**3h**)

White solid, m. p. 95-97°C, 84% yield. Reaction time 4h. <sup>1</sup>H NMR (400 MHz, CDCl<sub>3</sub>): δ 7.58-7.56 (m, 2H), 7.47-7.43 (m, 2H), 7.37-7.29 (m, 4H), 7.21-7.04 (m, 6H), 5.59 (s, 1H), 3.04 (s, 3H); <sup>13</sup>C NMR (100 MHz, CDCl<sub>3</sub>): δ 164.6, 162.1, 146.0, 138.0, 129.1, 128.6, 124.4, 123.5, 123.0, 120.9, 116.2, 116.0, 84.5, 45.7. HRMS (EI) *m/z* 370.1332 [M+Na]<sup>+</sup> (calcd for C<sub>21</sub>H<sub>18</sub>FN<sub>3</sub>ONa 370.1332).

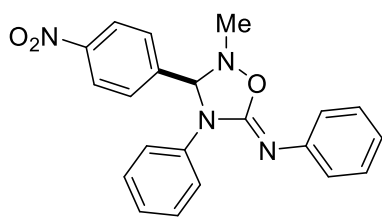

(R,Z)-2-methyl-3-(4-nitrophenyl)-N,4-diphenyl-1,2,4-oxadiazolidin-5-imine(**3i**)

White solid, m. p. 96-98°C, 83% yield. Reaction time 4h. <sup>1</sup>H NMR (400 MHz, Acetone-*d*<sub>6</sub>): δ 8.33-8.31 (m, 1H), 8.12 (s, 1H), 7.82-7.79 (m, 3H), 7.57-7.55 (m, 2H), 7.40-7.21 (m, 4H), 7.15-6.99 (m, 2H), 6.47 (s, 1H), 3.15 (s, 3H); <sup>13</sup>C NMR (100 MHz, Acetone-*d*<sub>6</sub>): δ 146.5, 140.0, 138.2, 128.9, 128.7, 128.5, 128.4, 123.9, 123.2, 122.7, 122.0, 120.1, 118.5, 82.3, 45.7. HRMS (EI) *m/z* 397.1275 [M+Na]<sup>+</sup> (calcd for C<sub>21</sub>H<sub>18</sub>N<sub>4</sub>O<sub>3</sub>Na 397.1277).

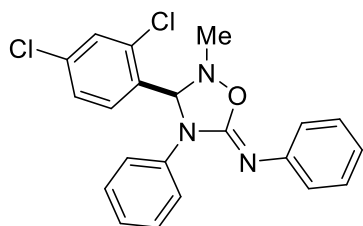

(R,Z)-3-(2,4-dichlorophenyl)-2-methyl-N,4-diphenyl-1,2,4-oxadiazolidin-5-imine(**3j**)

White solid, m. p. 85-87°C, 84% yield. Reaction time 4h. <sup>1</sup>H NMR (400 MHz, CDCl<sub>3</sub>): δ 7.61-7.53 (m, 3H), 7.38-7.27 (m, 8H), 7.21-7.05 (m, 2H), 6.07 (s, 1H), 3.11 (s, 3H); <sup>13</sup>C NMR (100 MHz, CDCl<sub>3</sub>): δ 147.3, 145.7, 137.9, 136.0, 134.4, 130.2, 129.2, 128.7, 128.6, 128.4, 127.9, 124.0, 123.5, 123.2, 119.3, 80.7, 46.4. HRMS (EI) *m/z* 420.0646 [M+Na]<sup>+</sup> (calcd for C<sub>21</sub>H<sub>17</sub>Cl<sub>2</sub>N<sub>3</sub>ONa 420.0646).

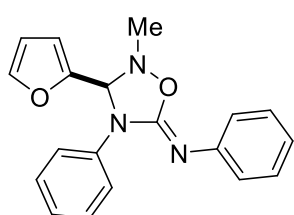

(R,Z)-3-(furan-2-yl)-2-methyl-N,4-diphenyl-1,2,4-oxadiazolidin-5-imine(**3k**)

White solid, m. p. 83-85°C, 89% yield. Reaction time 4h. <sup>1</sup>H NMR (400 MHz, CDCl<sub>3</sub>): δ 7.68-7.66 (m, 2H), 7.49(s,1H), 7.39-7.32 (m, 5H), 7.30-7.03 (m, 3H), 6.49 (s, 1H), 6.40 (s, 1H), 5.72 (s, 1H), 3.05

(s, 3H);  $^{13}\text{C}$  NMR (100 MHz,  $\text{CDCl}_3$ ):  $\delta$  149.4, 145.9, 143.7, 138.0, 129.0, 128.6, 124.2, 123.5, 123.0, 120.2, 110.7, 109.7, 78.7, 45.8. HRMS (EI)  $m/z$  342.1220  $[\text{M}+\text{Na}]^+$  (calcd for  $\text{C}_{19}\text{H}_{17}\text{N}_3\text{O}_2\text{Na}$  342.1218).

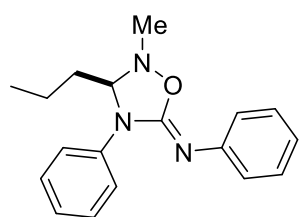

(*R,Z*)-2-methyl-*N*,4-diphenyl-3-propyl-1,2,4-oxadiazolidin-5-imine(**3I**)

Cololess oil, 75% yield. Reaction time 4h.  $^1\text{H}$  NMR (400 MHz,  $\text{CDCl}_3$ ):  $\delta$  7.78 (d, 2H,  $J=8\text{Hz}$ ), 7.47-7.43 (m, 2H), 7.33-7.29 (m, 2H), 7.18-7.16 (m, 3H), 7.08-7.04 (m, 1H), 4.76 (m, 1H), 2.94 (s, 3H), 1.85-1.79 (m, 2H), 1.68-48 (m, 2H), 1.00 (t, 3H,  $J=8\text{Hz}$ );  $^{13}\text{C}$  NMR (100 MHz,  $\text{CDCl}_3$ ):  $\delta$  147.2, 146.4, 138.1, 129.3, 128.6, 123.9, 123.4, 122.8, 120.1, 82.9, 46.4, 34.3, 17.9, 13.8. HRMS (EI)  $m/z$  318.1582  $[\text{M}+\text{Na}]^+$  (calcd for  $\text{C}_{18}\text{H}_{21}\text{N}_3\text{ONa}$  318.1582).

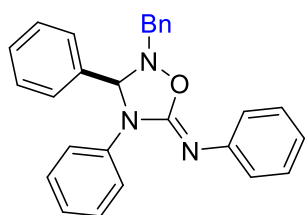

(*R,Z*)-2-benzyl-*N*,3,4-triphenyl-1,2,4-oxadiazolidin-5-imine(**3m**)

Cololess oil, 70% yield. Reaction time 4h.  $^1\text{H}$  NMR (400 MHz,  $\text{CDCl}_3$ ):  $\delta$  7.64-7.62 (m, 2H), 7.41-7.20 (m, 16H), 7.12-7.03 (m, 2H), 5.82 (s, 1H), 4.50 (d, 1H,  $J=11\text{Hz}$ ), 4.20 (d, 1H,  $J=11\text{Hz}$ );  $^{13}\text{C}$  NMR (100 MHz,  $\text{CDCl}_3$ ):  $\delta$  147.6, 146.0, 138.4, 134.2, 129.8, 129.1, 128.9, 128.8, 128.6, 128.5, 128.0, 126.7, 123.7, 123.5, 123.0, 119.6, 80.3, 62.3. HRMS (EI)  $m/z$  428.4911  $[\text{M}+\text{Na}]^+$  (calcd for  $\text{C}_{27}\text{H}_{23}\text{N}_3\text{ONa}$  428.4908).

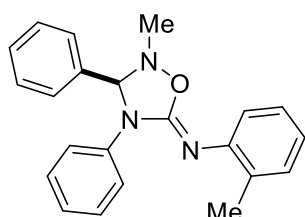

(*R,Z*)-2-methyl-3,4-diphenyl-*N*-(*o*-tolyl)-1,2,4-oxadiazolidin-5-imine(**4a**)

White solid, m. p. 80-81°C, 86% yield. Reaction time 4h.  $^1\text{H}$  NMR (400 MHz,  $\text{CDCl}_3$ ):  $\delta$  7.64-7.62 (m, 2H), 7.48-7.31 (m, 7H), 7.20-6.97 (m, 5H), 5.62 (s, 1H), 3.01 (s, 3H), 2.34 (s, 3H);  $^{13}\text{C}$  NMR (100 MHz,  $\text{CDCl}_3$ ):  $\delta$  145.1, 138.3, 130.8, 130.0, 129.5, 129.0, 128.9, 127.1, 126.0, 123.9, 122.4, 120.3, 85.1, 46.0, 18.6. HRMS (EI)  $m/z$  366.1582  $[\text{M}+\text{Na}]^+$  (calcd for  $\text{C}_{22}\text{H}_{21}\text{N}_3\text{ONa}$  366.1582).

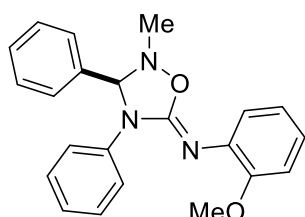

(*R,Z*)-*N*-(2-methoxyphenyl)-2-methyl-3,4-diphenyl-1,2,4-oxadiazolidin-5-imine(**4b**)

White solid, m. p. 81-83°C, 90% yield. Reaction time 4h.  $^1\text{H}$  NMR (400 MHz,  $\text{CDCl}_3$ ):  $\delta$  7.65-7.63 (m, 2H), 7.51-7.29 (m, 7H), 7.11-6.90 (m, 5H), 5.61 (s, 1H), 3.87 (s, 3H), 3.04 (s, 3H);  $^{13}\text{C}$  NMR (100 MHz,  $\text{CDCl}_3$ ):  $\delta$  151.7, 138.5, 136.7, 136.1, 129.4, 129.0, 127.0, 123.9, 123.7, 123.6, 120.6, 120.3, 111.4, 85.4, 55.6, 46.3. HRMS (EI)  $m/z$  382.1530  $[\text{M}+\text{Na}]^+$  (calcd for  $\text{C}_{22}\text{H}_{21}\text{N}_3\text{O}_2\text{Na}$  382.1531).

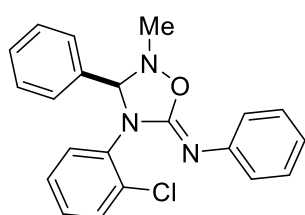

(*R,Z*)-*N*-(2-chlorophenyl)-2-methyl-3,4-diphenyl-1,2,4-oxadiazolidin-5-imine(**4c**)

White solid, m. p. 82-84°C, 79% yield. Reaction time 4h.  $^1\text{H}$  NMR (400 MHz,  $\text{CDCl}_3$ ):  $\delta$  7.66-7.64 (m, 2H), 7.48-7.28 (m, 8H),



7.21-7.11 (m, 3H), 7.01-6.97 (m, 1H), 5.63 (s, 1H), 3.07 (s, 3H);  $^{13}\text{C}$  NMR (100 MHz,  $\text{CDCl}_3$ ):  $\delta$  148.3, 144.1, 138.0, 136.2, 129.6, 129.4, 129.1, 127.7, 127.1, 127.0, 124.4, 124.2, 123.8, 120.7, 85.6, 46.3. HRMS (EI)  $m/z$  386.1035  $[\text{M}+\text{Na}]^+$  (calcd for  $\text{C}_{21}\text{H}_{18}\text{ClN}_3\text{ONa}$  386.1036).

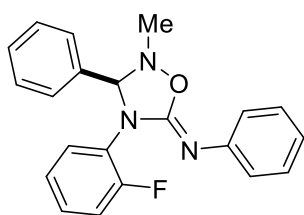

(*R,Z*)-4-(2-fluorophenyl)-2-methyl-N,3-diphenyl-1,2,4-oxadiazolidin-5-imine(**4d**)

White solid, m. p. 70-71°C, 81% yield. Reaction time 4h.  $^1\text{H}$  NMR (400 MHz,  $\text{CDCl}_3$ ):  $\delta$  8.33-8.30 (m, 1H), 7.57-7.48 (m, 3H), 7.45-7.30 (m, 10H), 5.67 (s, 1H), 3.04 (s, 3H);  $^{13}\text{C}$  NMR (100 MHz,  $\text{CDCl}_3$ ):  $\delta$  142.7, 138.2, 134.3, 129.6, 129.3, 129.1, 127.8, 127.2, 125.9, 125.7, 125.1, 124.3, 124.2, 122.9, 117.8, 85.3, 45.9. HRMS (EI)  $m/z$  370.1332  $[\text{M}+\text{Na}]^+$  (calcd for  $\text{C}_{21}\text{H}_{18}\text{FN}_3\text{ONa}$  370.1332).

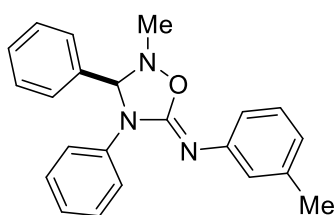

(*R,Z*)-2-methyl-3,4-diphenyl-N-(*m*-tolyl)-1,2,4-oxadiazolidin-5-imine(**4e**)

Colorless oil, 76% yield. Reaction time 4h.  $^1\text{H}$  NMR (400 MHz,  $\text{CDCl}_3$ ):  $\delta$  7.68-7.66 (m, 1H), 7.56-7.25 (m, 10H), 7.18-6.94 (m, 3H), 5.64 (s, 1H), 3.07 (s, 3H), 2.41 (d, 3H,  $J=8\text{Hz}$ );  $^{13}\text{C}$  NMR (100 MHz,  $\text{CDCl}_3$ ):  $\delta$  146.4, 146.2, 139.0, 138.4, 138.2, 136.5, 129.1, 129.0, 128.7, 128.5, 127.2, 125.2, 124.3, 124.2, 123.8, 123.6, 122.9, 121.6, 120.7, 120.6, 118.0, 85.1, 45.9, 21.7, 21.6. HRMS (EI)  $m/z$  366.1584  $[\text{M}+\text{Na}]^+$  (calcd for  $\text{C}_{22}\text{H}_{21}\text{N}_3\text{ONa}$  366.1582).

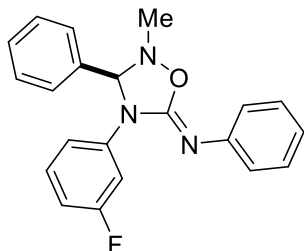

(*R,Z*)-4-(3-fluorophenyl)-2-methyl-N,3-diphenyl-1,2,4-oxadiazolidin-5-imine(**4f**)

White solid, m. p. 70-72°C, 83% yield. Reaction time 4h.  $^1\text{H}$  NMR (400 MHz,  $\text{CDCl}_3$ ):  $\delta$  7.71-7.69 (m, 2H), 7.59-7.08 (m, 9H), 7.02-6.75 (m, 3H), 5.62 (s, 1H), 3.06 (s, 3H);  $^{13}\text{C}$  NMR (100 MHz,  $\text{CDCl}_3$ ):  $\delta$  164.3, 164.2, 161.9, 161.8, 145.8, 139.8, 139.7, 137.9, 129.7, 129.5, 129.2, 129.1, 129.0, 128.7, 127.2, 127.0, 124.6, 123.6, 121.2, 119.5, 110.9, 110.8, 110.6, 110.5, 109.7, 109.5, 84.8, 46.0, 45.8. HRMS (EI)  $m/z$  370.1330  $[\text{M}+\text{Na}]^+$  (calcd for  $\text{C}_{21}\text{H}_{18}\text{FN}_3\text{ONa}$  370.1332).

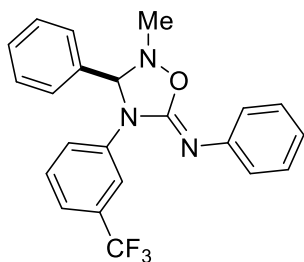

(*R,Z*)-2-methyl-N,3-diphenyl-4-(3-(trifluoromethyl)phenyl)-1,2,4-oxadiazolidin-5-imine(**4g**)

White solid, m. p. 59-61°C, 81% yield. Reaction time 4h.  $^1\text{H}$  NMR (400 MHz,  $\text{CDCl}_3$ ):  $\delta$  7.71-7.70 (m, 1H), 7.56-7.07 (m, 13H), 5.63 (s, 1H), 3.03 (s, 3H);  $^{13}\text{C}$  NMR (100 MHz,  $\text{CDCl}_3$ ):  $\delta$  145.5, 138.7, 135.2, 129.9, 129.4, 129.2, 129.1, 129.0, 128.7, 127.2, 125.1, 123.6, 123.4, 123.3, 120.4, 84.9, 45.8. HRMS (EI)  $m/z$  420.1304  $[\text{M}+\text{Na}]^+$  (calcd for  $\text{C}_{22}\text{H}_{18}\text{F}_3\text{N}_3\text{ONa}$  420.1300).

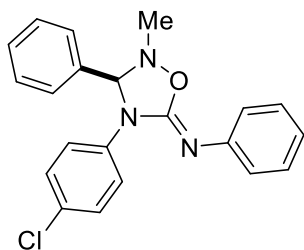

(*R,Z*)-4-(4-chlorophenyl)-2-methyl-*N*,3-diphenyl-1,2,4-oxadiazolidin-5-imine(**4h**)

White solid, m. p. 82-84°C, 80% yield. Reaction time 4h. <sup>1</sup>H NMR (400 MHz, CDCl<sub>3</sub>): δ 7.59-7.56 (m, 2H), 7.47-7.23 (m, 10H), 7.18-7.09 (m, 2H), 5.60 (d, 1H, *J*= 20Hz), 3.04 (s, 3H); <sup>13</sup>C NMR (100 MHz, CDCl<sub>3</sub>): δ 145.9, 144.9, 137.9, 136.7, 129.9, 129.7, 129.4, 129.2, 129.1, 129.0, 128.8, 128.6, 128.0, 127.3, 125.1, 124.5, 123.6, 123.1, 122.2, 121.1, 85.2, 45.6. HRMS (EI) *m/z* 386.1036 [M+Na]<sup>+</sup> (calcd for C<sub>21</sub>H<sub>18</sub>ClN<sub>3</sub>ONa 386.1036).

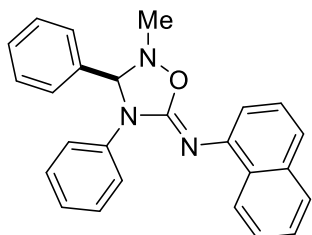

(*R,Z*)-2-methyl-*N*-(naphthalen-1-yl)-3,4-diphenyl-1,2,4-oxadiazolidin-5-imine(**4i**)

White solid, m. p. 81-83°C, 81% yield. Reaction time 4h. <sup>1</sup>H NMR (400 MHz, CDCl<sub>3</sub>): δ 7.61-7.59 (m, 2H), 7.49-7.20 (m, 8H), 7.18-7.00 (m, 7H), 5.63 (s, 1H), 3.07 (s, 3H); <sup>13</sup>C NMR (100 MHz, CDCl<sub>3</sub>): δ 156.4, 154.0, 138.0, 134.7, 129.6, 129.1, 127.1, 125.2, 125.1, 124.4, 123.9, 123.8, 123.7, 123.6, 120.8, 115.7, 115.5, 85.7, 46.1. HRMS (EI) *m/z* 402.1581 [M+Na]<sup>+</sup> (calcd for C<sub>25</sub>H<sub>21</sub>N<sub>3</sub>ONa 402.1582).

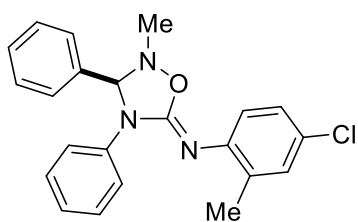

(*R,Z*)-*N*-(4-chloro-2-methylphenyl)-2-methyl-3,4-diphenyl-1,2,4-oxadiazolidin-5-imine(**4j**)

White solid, m. p. 58-60°C, 86% yield. Reaction time 4h. <sup>1</sup>H NMR (400 MHz, CDCl<sub>3</sub>): δ 7.60-7.58 (m, 2H), 7.47-6.99 (11H), 5.82 (s, 1H), 3.03 (s, 3H), 2.31 (s, 3H); <sup>13</sup>C NMR (100 MHz, CDCl<sub>3</sub>): δ 143.8, 138.0, 132.8, 131.3, 130.1, 129.8, 129.7, 129.6, 129.1, 129.0, 128.9, 128.5, 128.4, 127.7, 127.2, 126.7, 125.9, 124.3, 123.6, 123.5, 122.7, 120.7, 85.4, 45.8, 18.5. HRMS (EI) *m/z* 400.1196 [M+Na]<sup>+</sup> (calcd for C<sub>22</sub>H<sub>20</sub>ClN<sub>3</sub>ONa 400.1193).

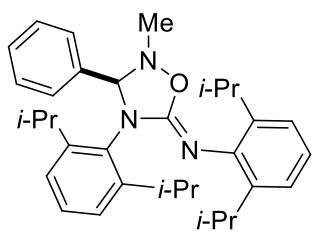

(*R,Z*)-*N*,4-bis(2,6-diisopropylphenyl)-2-methyl-3-phenyl-1,2,4-oxadiazolidin-5-imine(**4k**)

White solid, m. p. 105-107°C, 66% yield. Reaction time 4h. <sup>1</sup>H NMR (400 MHz, CDCl<sub>3</sub>): δ 7.37-7.26 (m, 7H), 7.12-7.00 (m, 4H), 5.31 (s, 1H), 3.46-3.42 (m, 1H), 3.32-3.27 (m, 2H), 3.25-3.12 (m, 1H), 2.91 (s, 3H), 1.59-1.47 (m, 7H), 1.31-1.17 (m, 17H); <sup>13</sup>C NMR (100 MHz, CDCl<sub>3</sub>): δ 150.0, 148.3, 147.8, 142.8, 140.4, 134.6, 129.7, 129.4, 128.7, 128.6, 124.5, 124.4, 122.8, 122.5, 88.2, 44.4, 29.0, 28.6, 27.9, 25.5, 24.6, 23.2. HRMS (EI) *m/z* 520.3303 [M+Na]<sup>+</sup> (calcd for C<sub>33</sub>H<sub>43</sub>N<sub>3</sub>ONa 520.3304).

#### 4 NMR spectra

DHM-5-2-1H

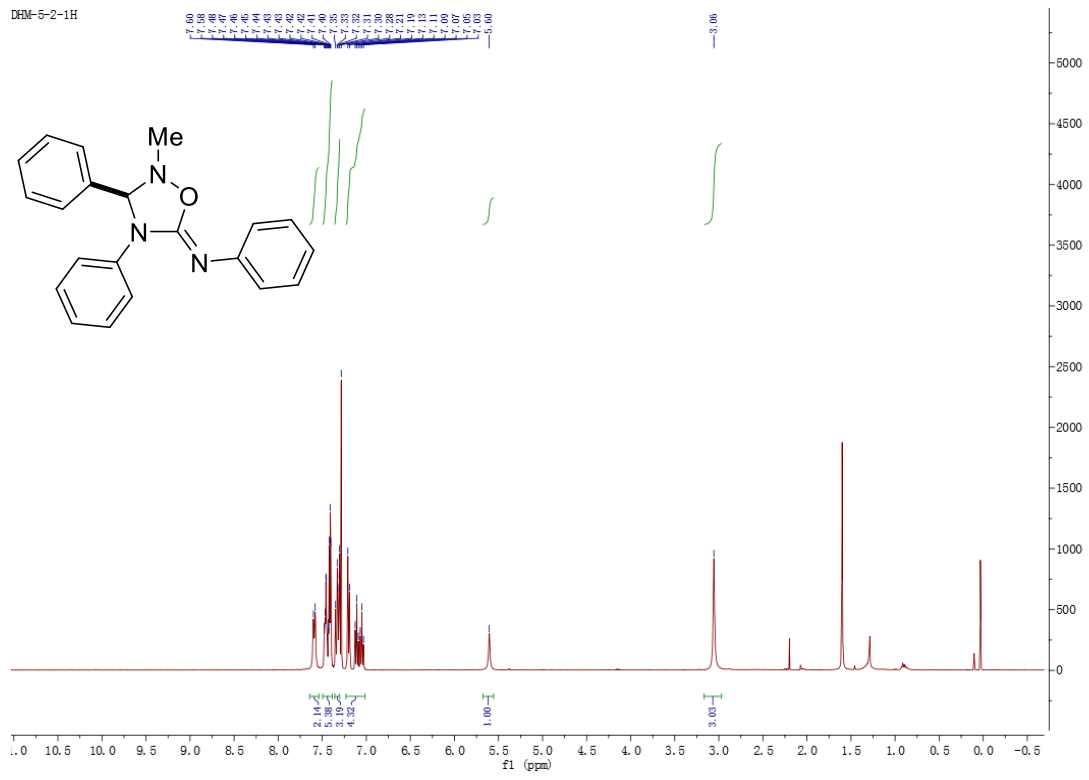

DHM-5-2-13C

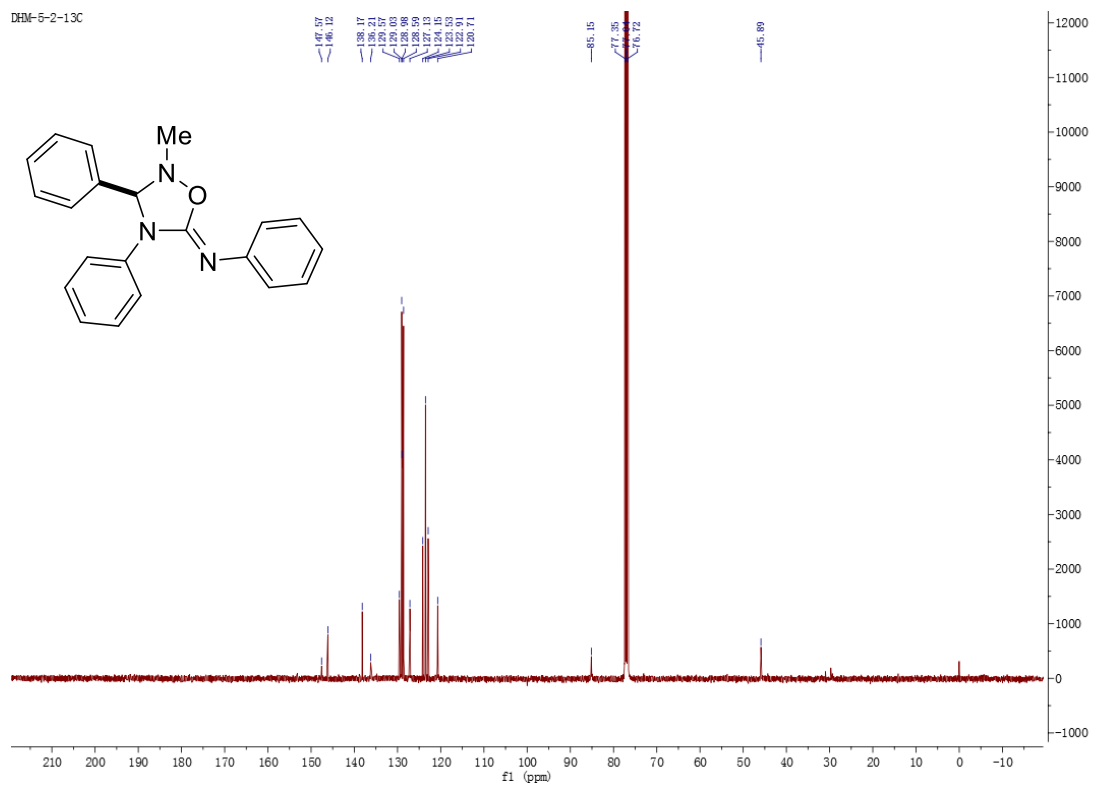

cty1-8-2

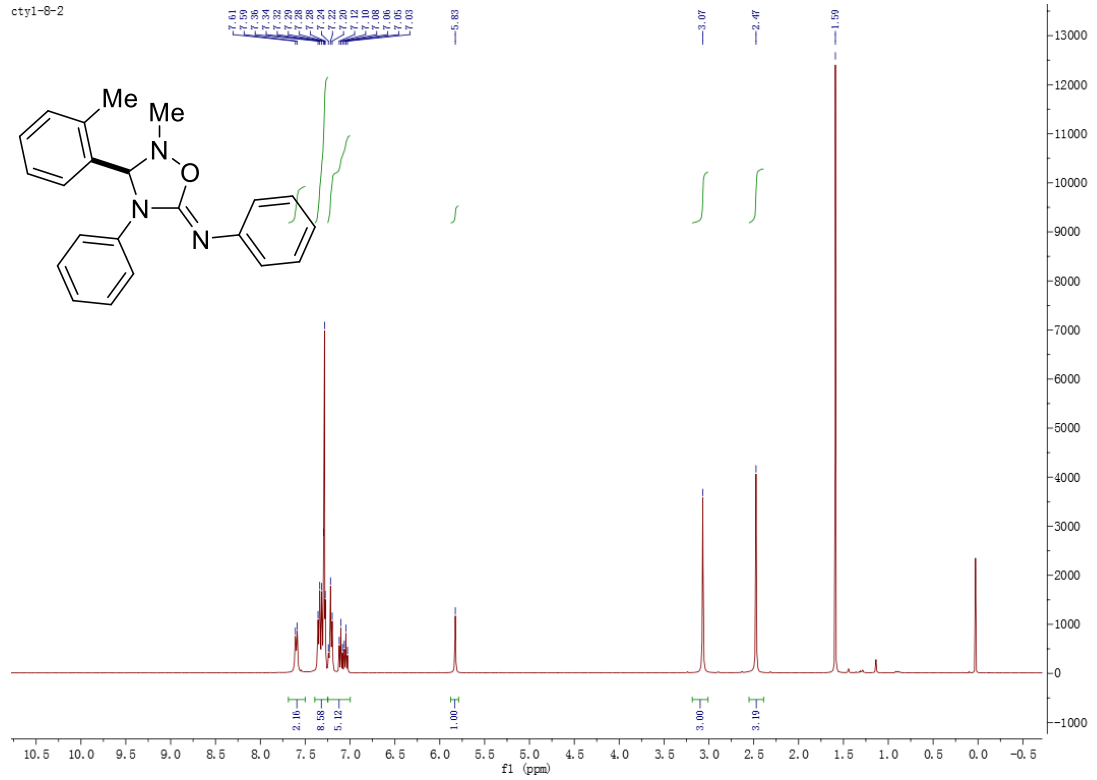

cty1-8-2-13c

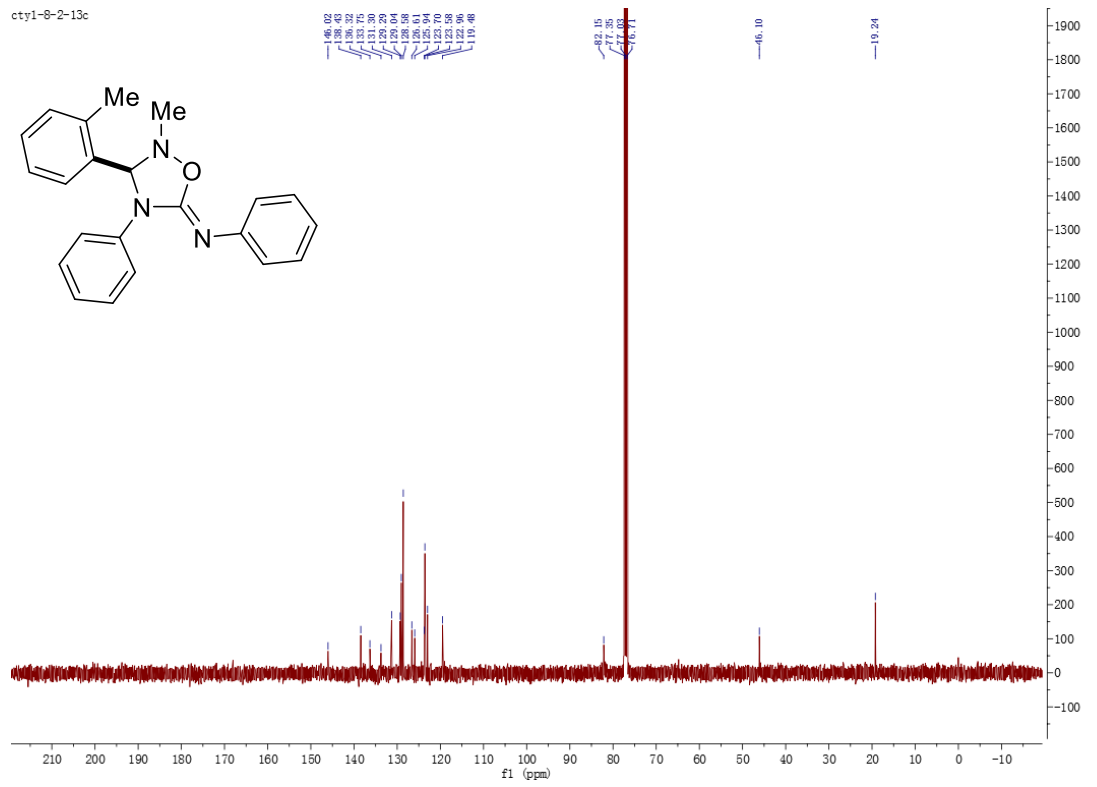

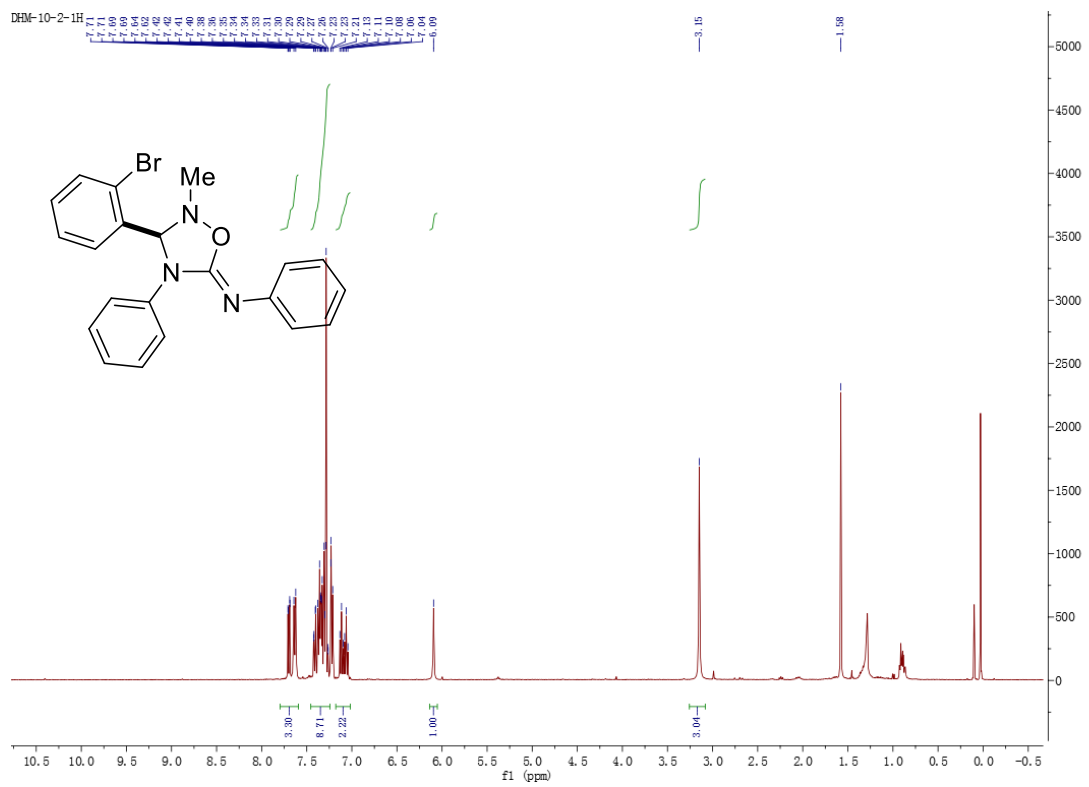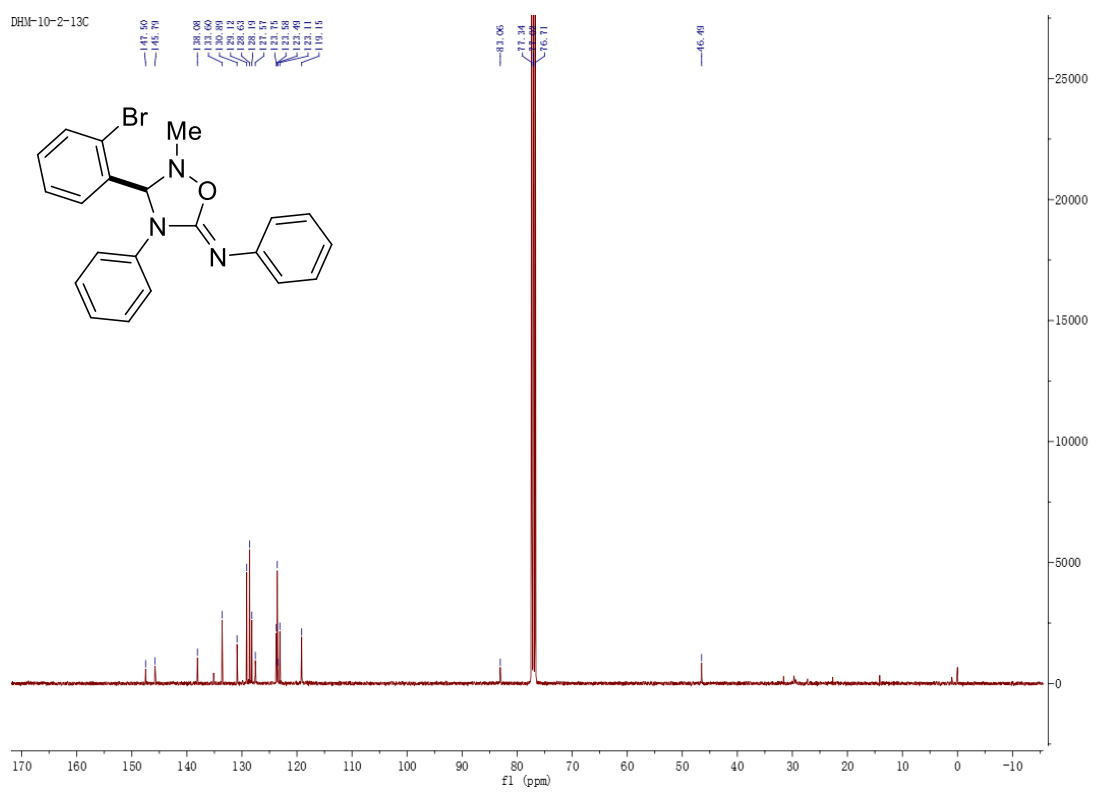

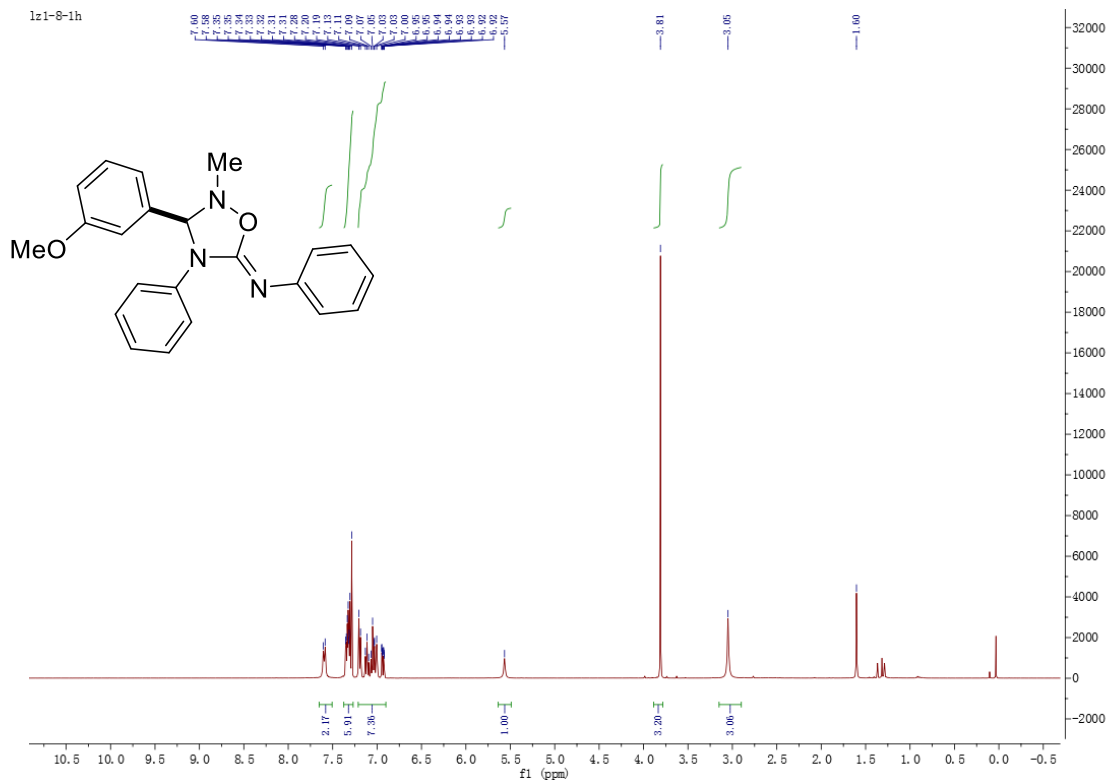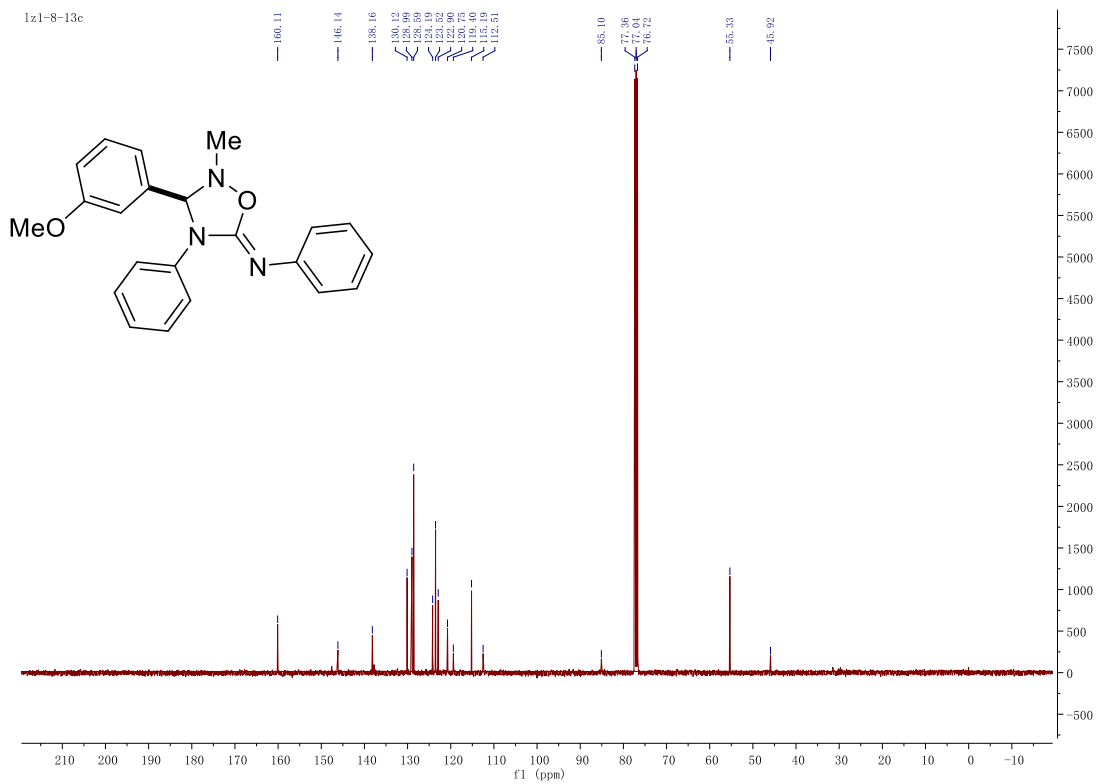

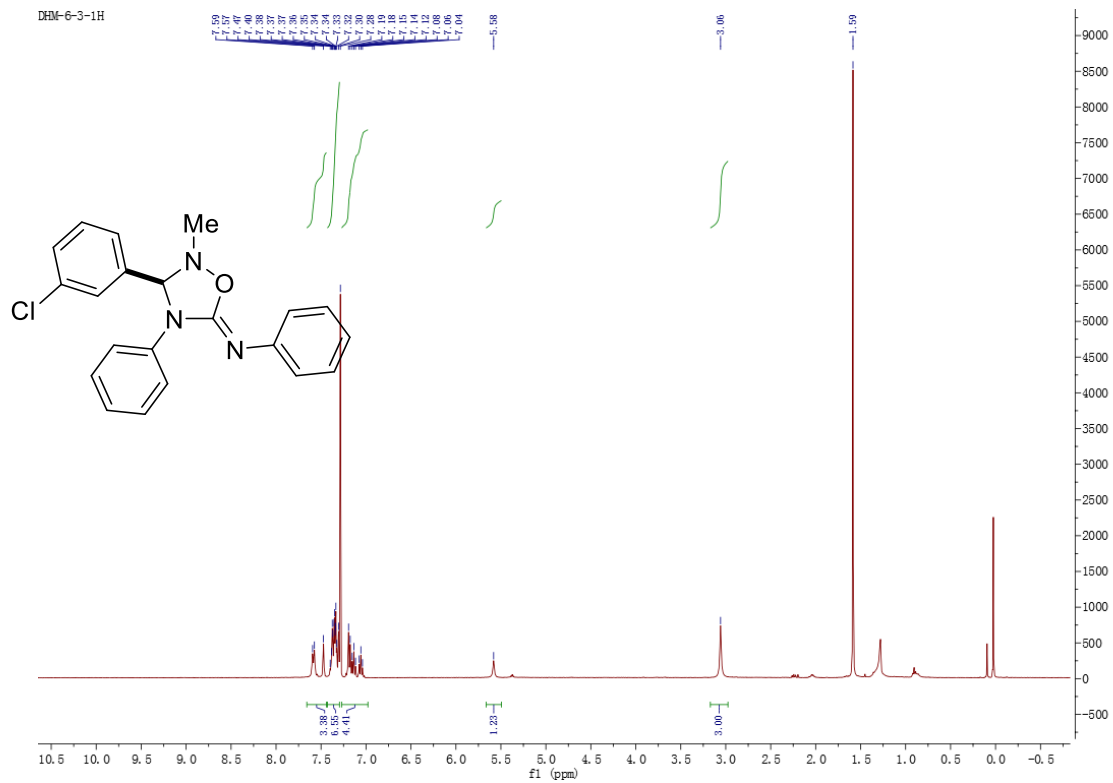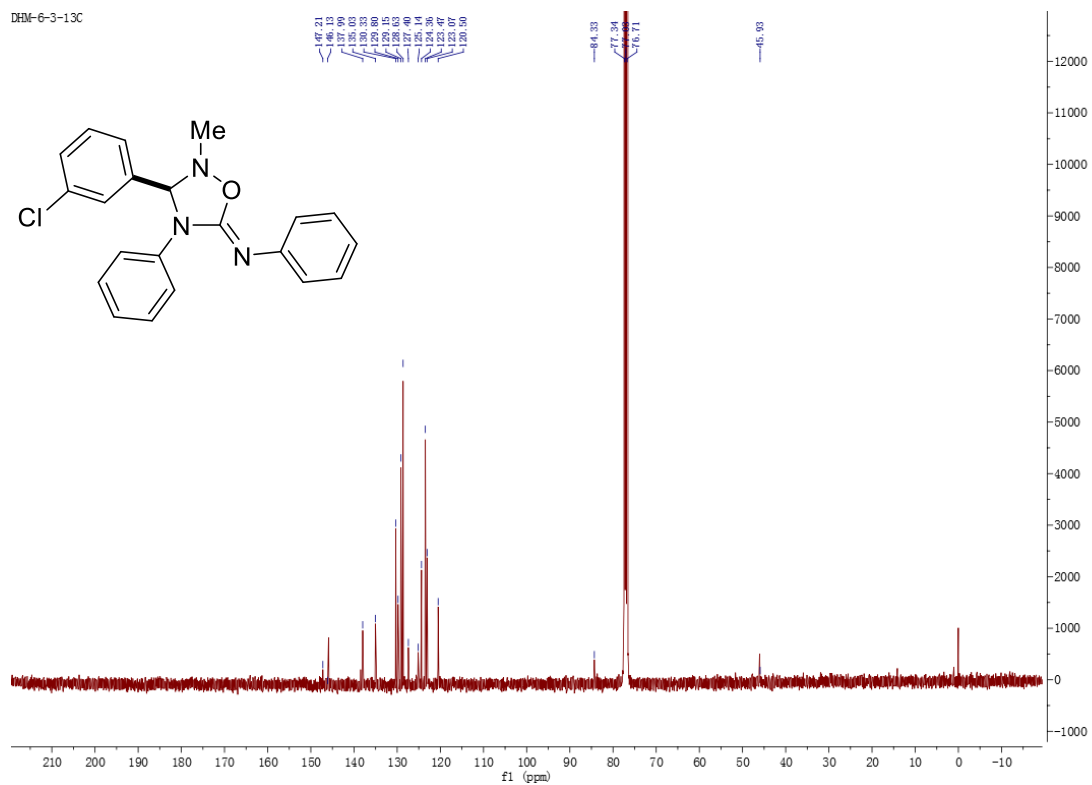

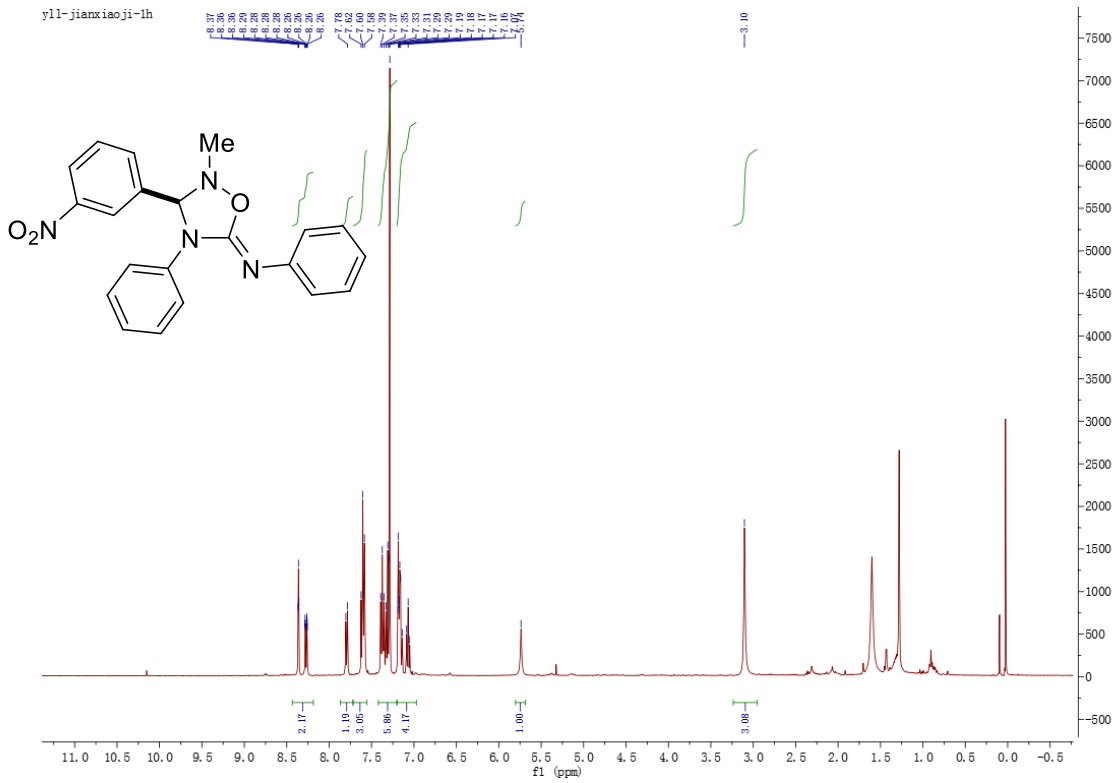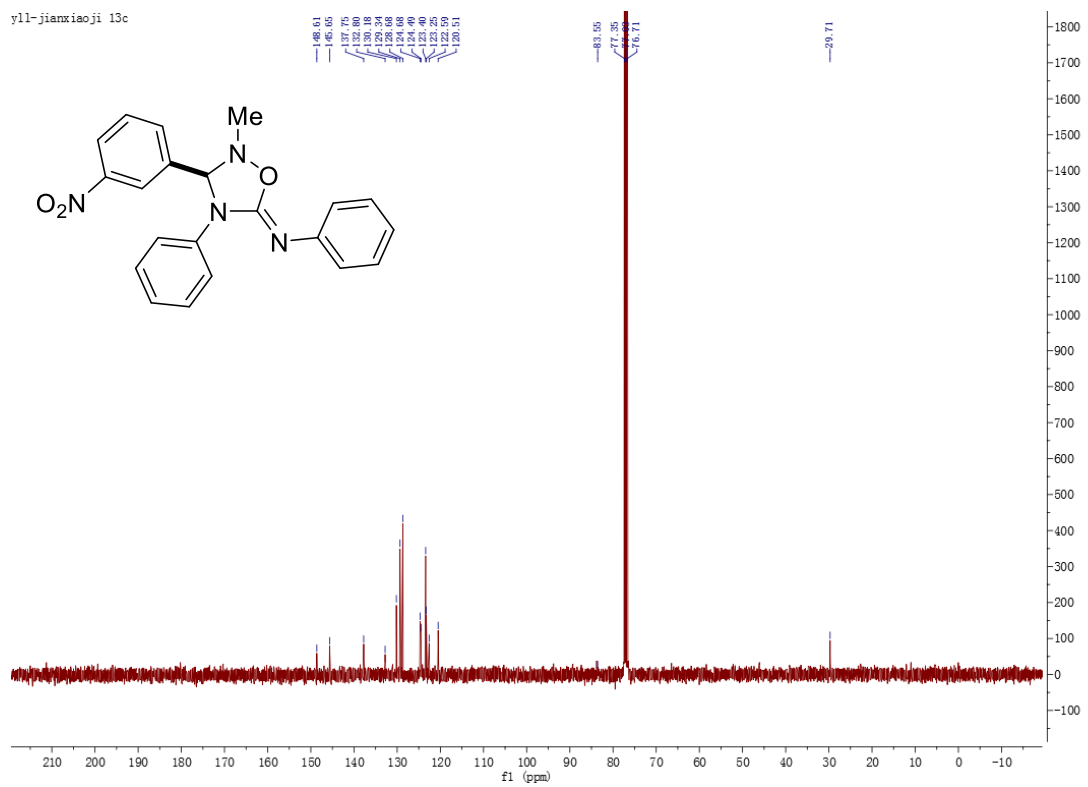





XQ88-1-1

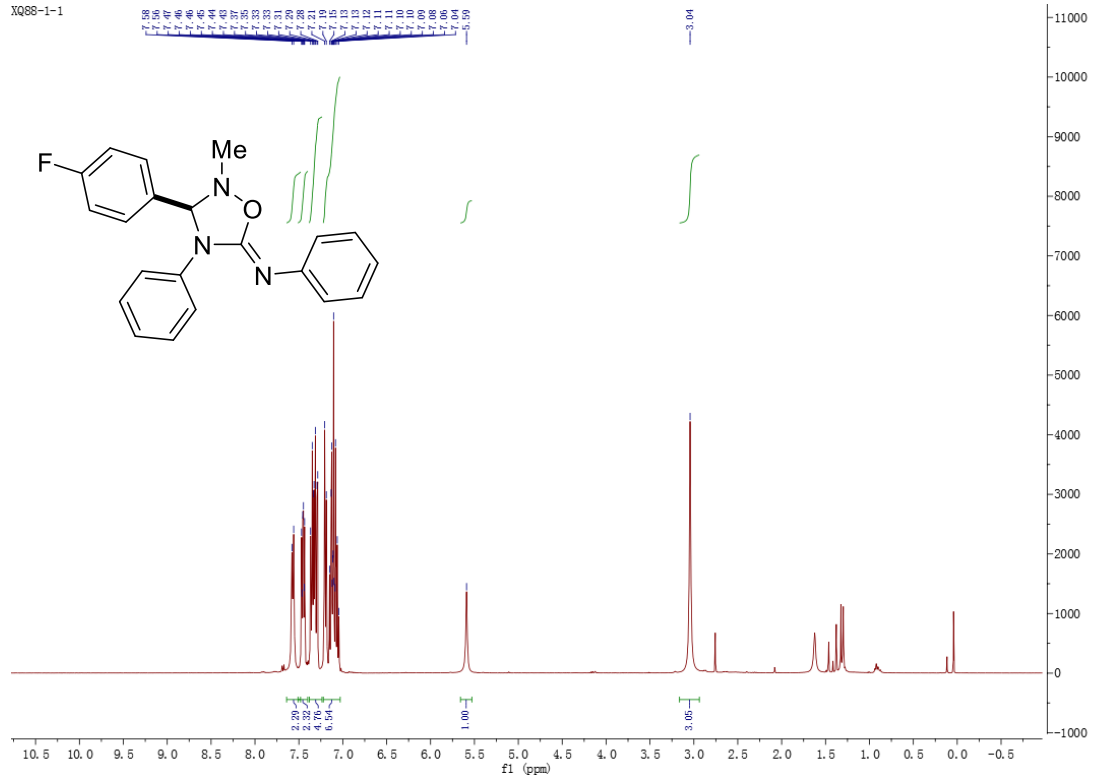

xq88-1-1-13c

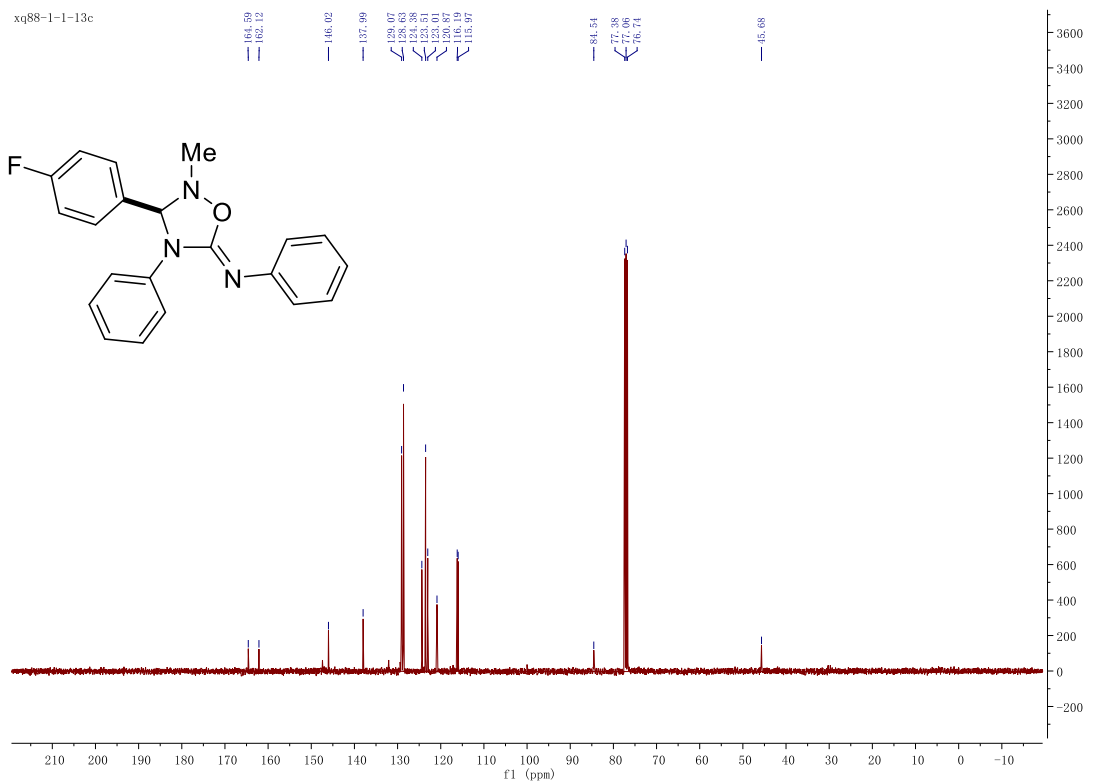

y1180-2-2-1h

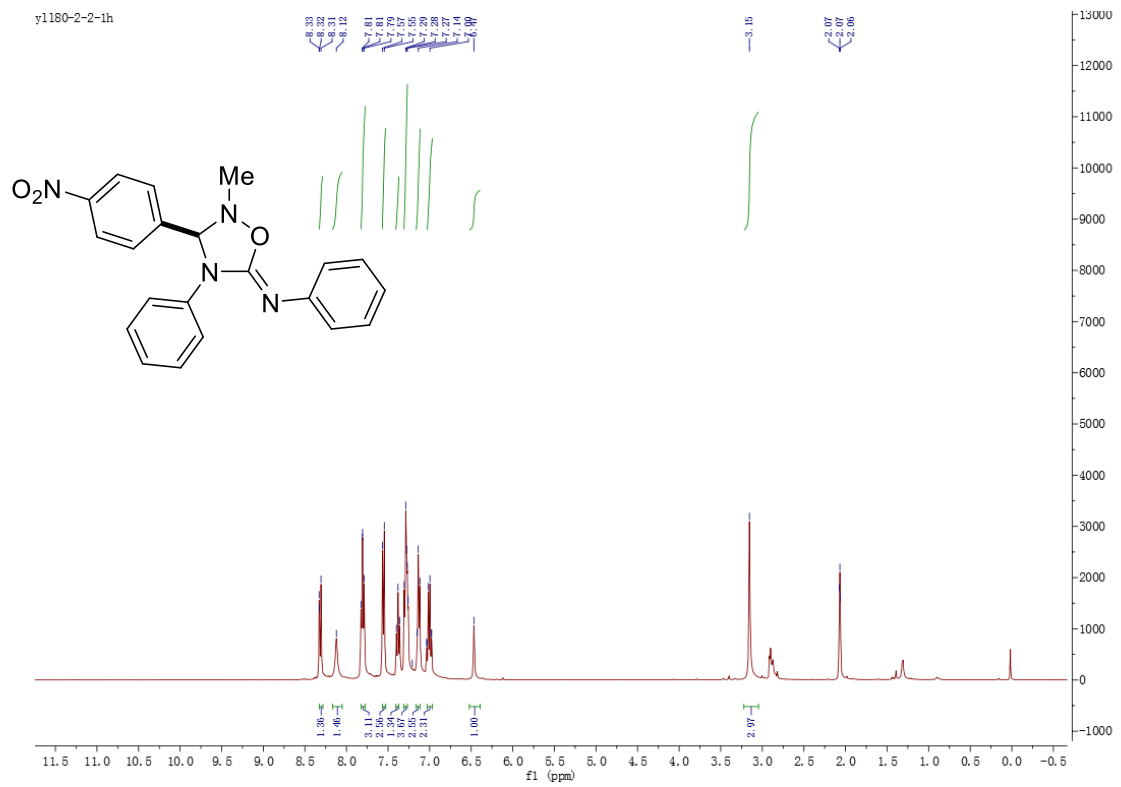

y1180-2-2-13c

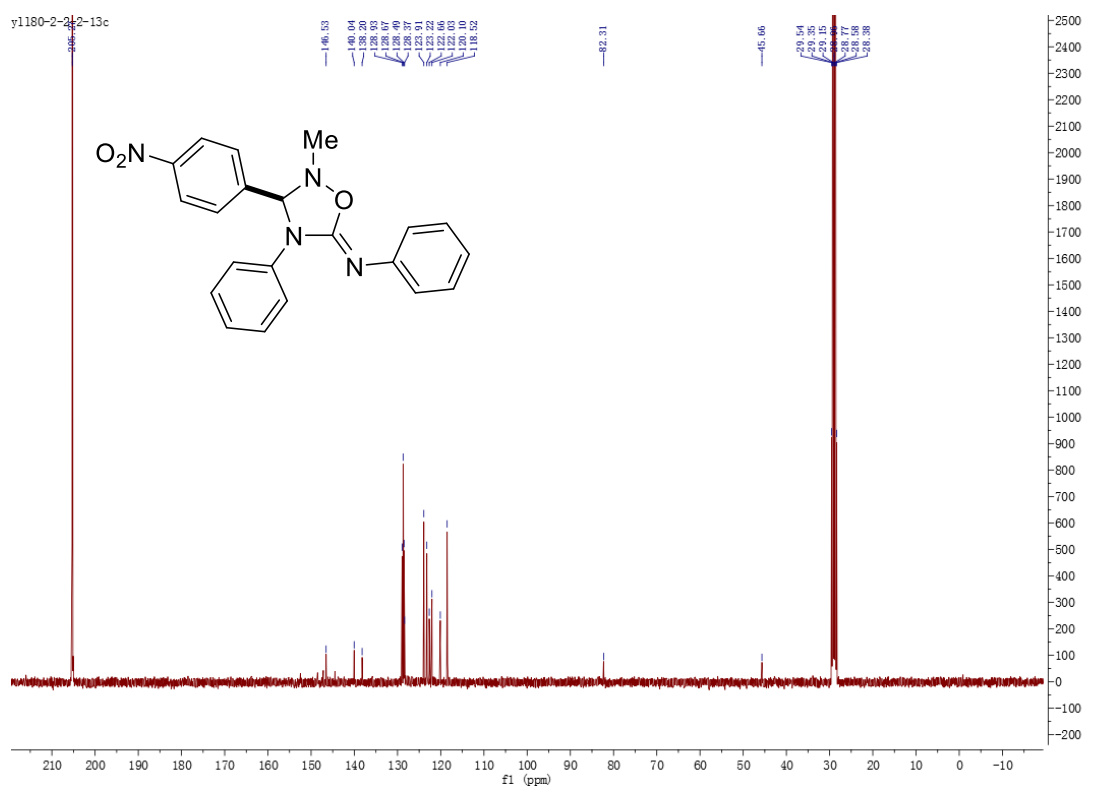

cy-13-1-1H

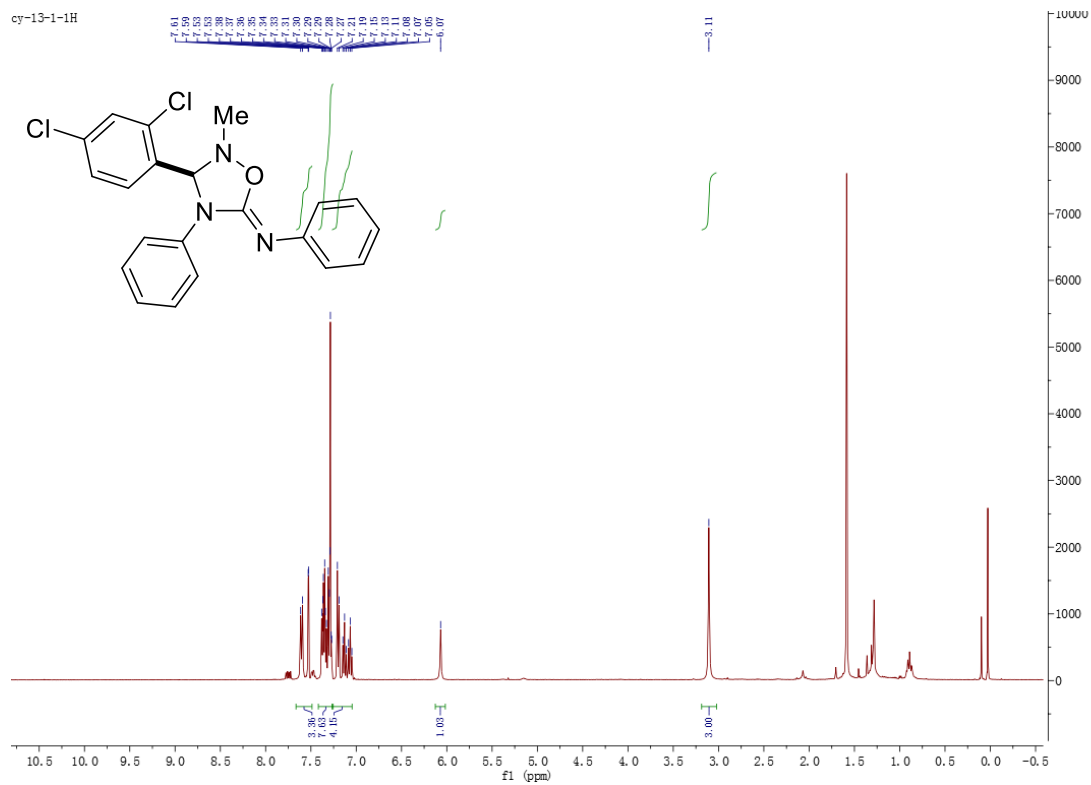

cy-13-1-13C

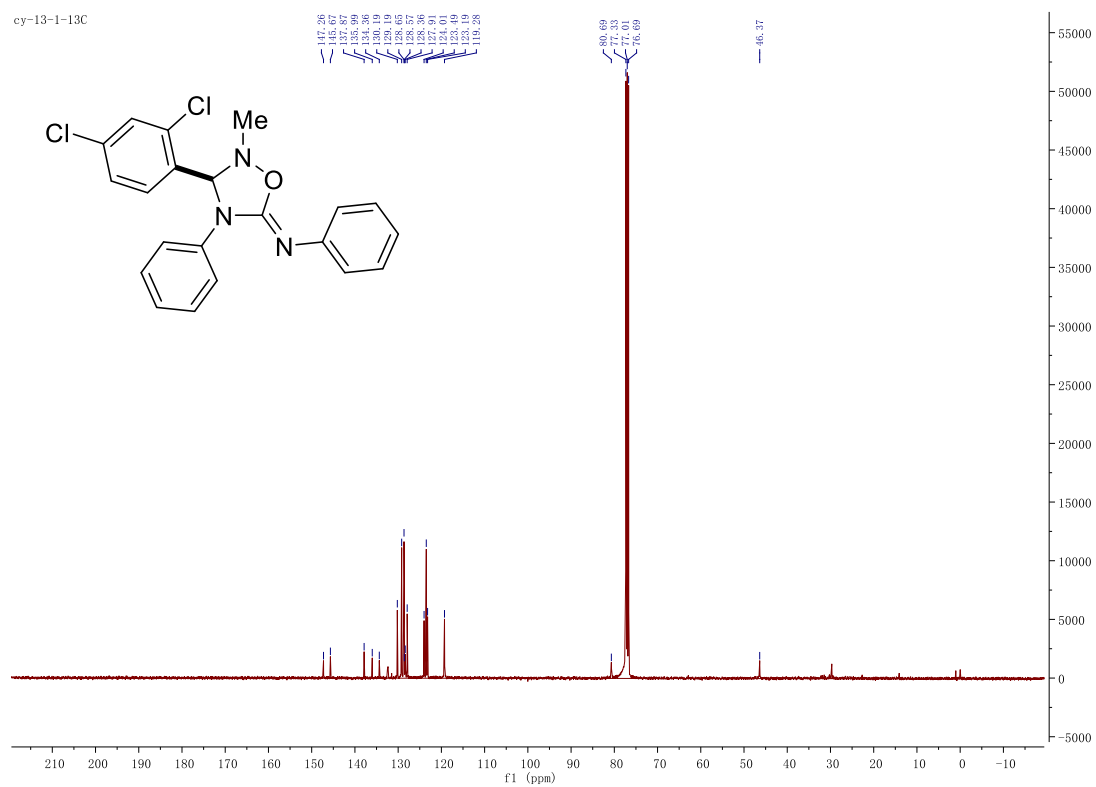

DHM-8-2-1H

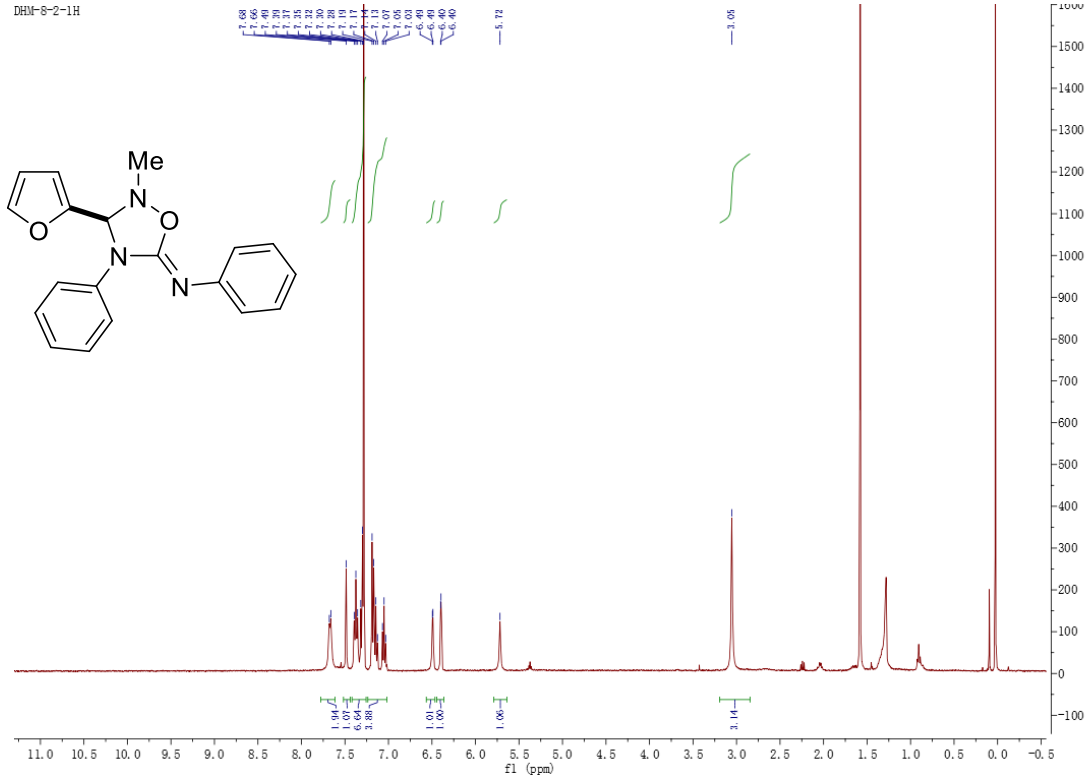

DHM-8-2-13C

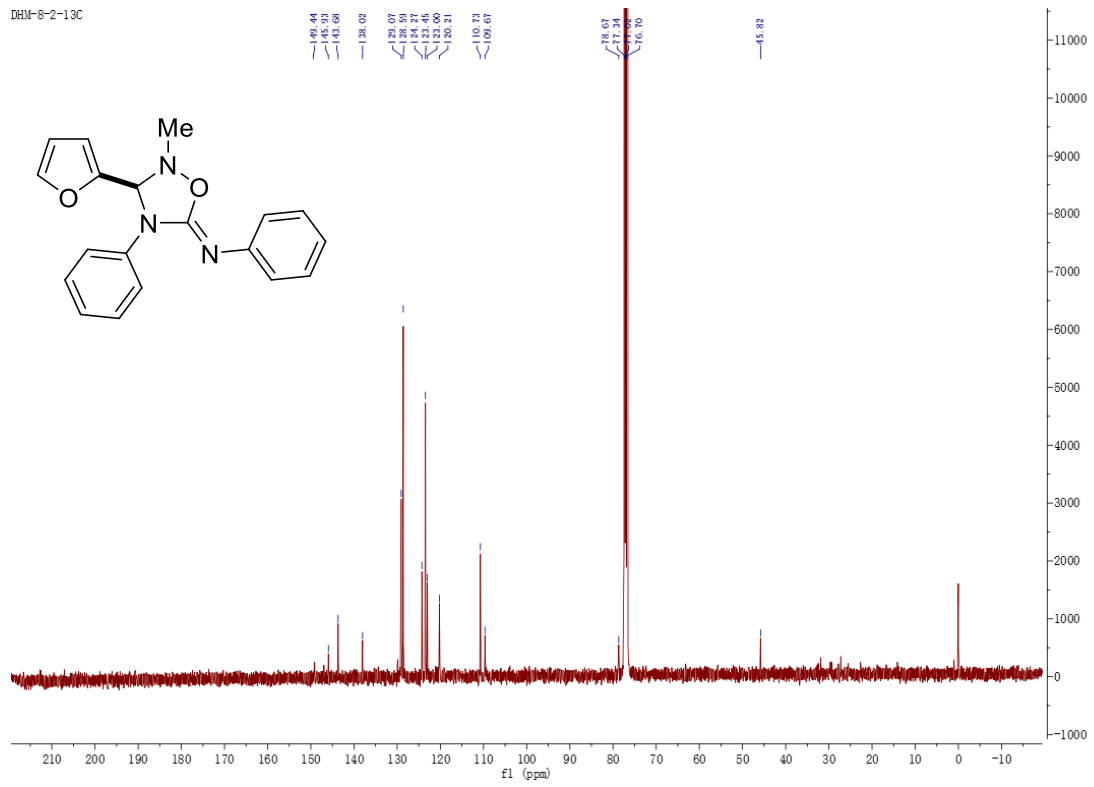

cy-18-1-1H

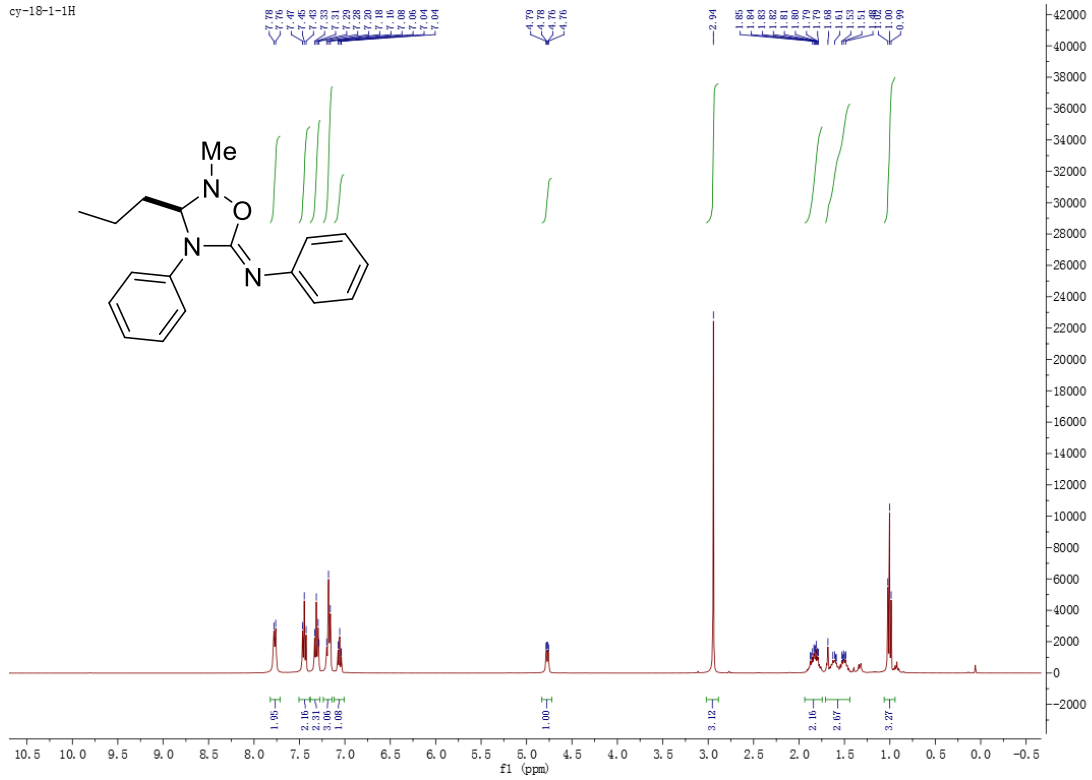

CY-18-1-13C

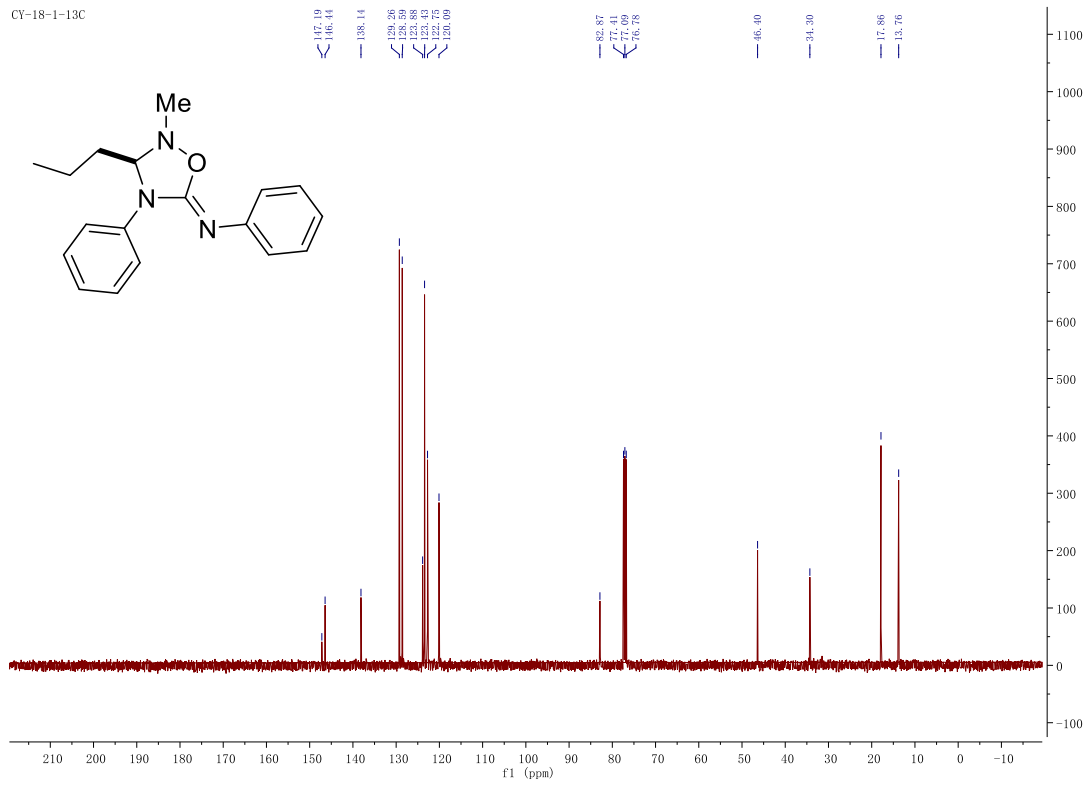

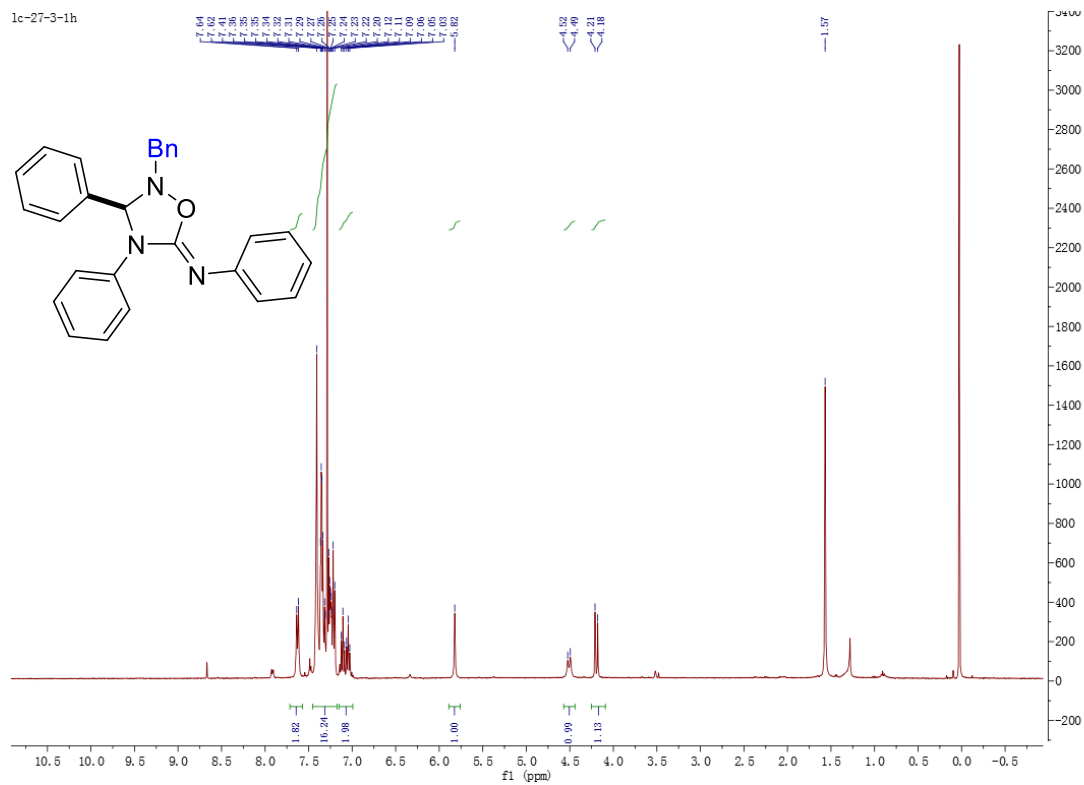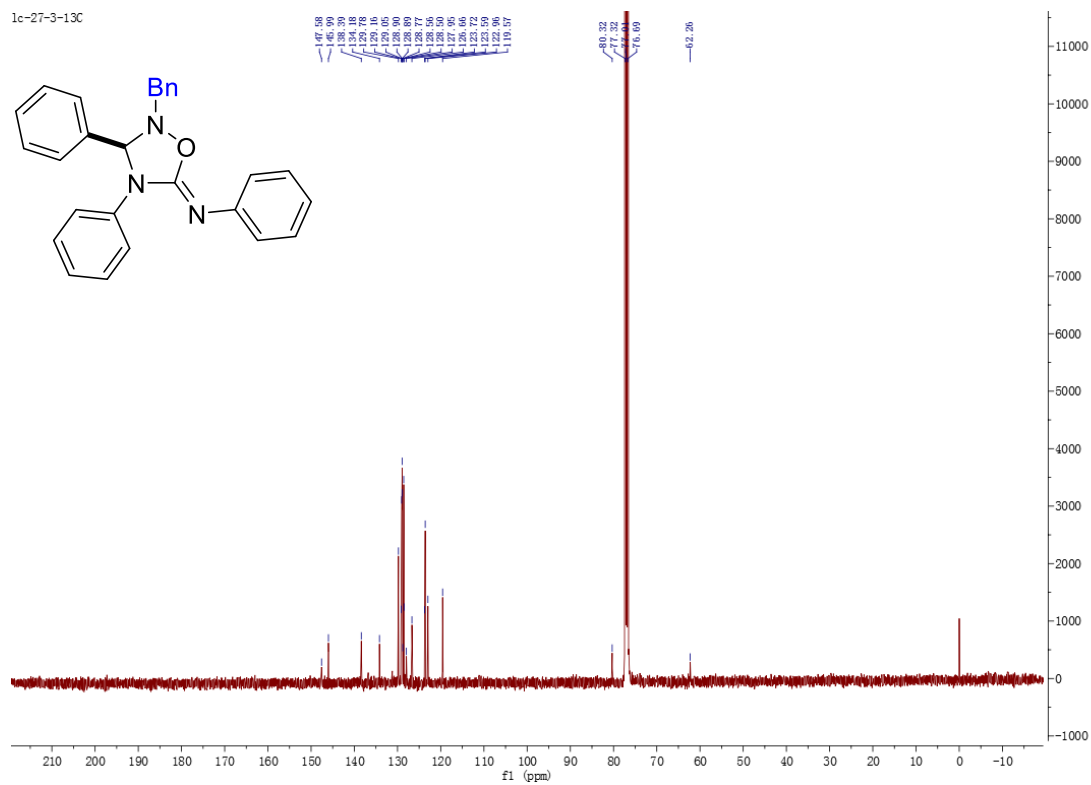

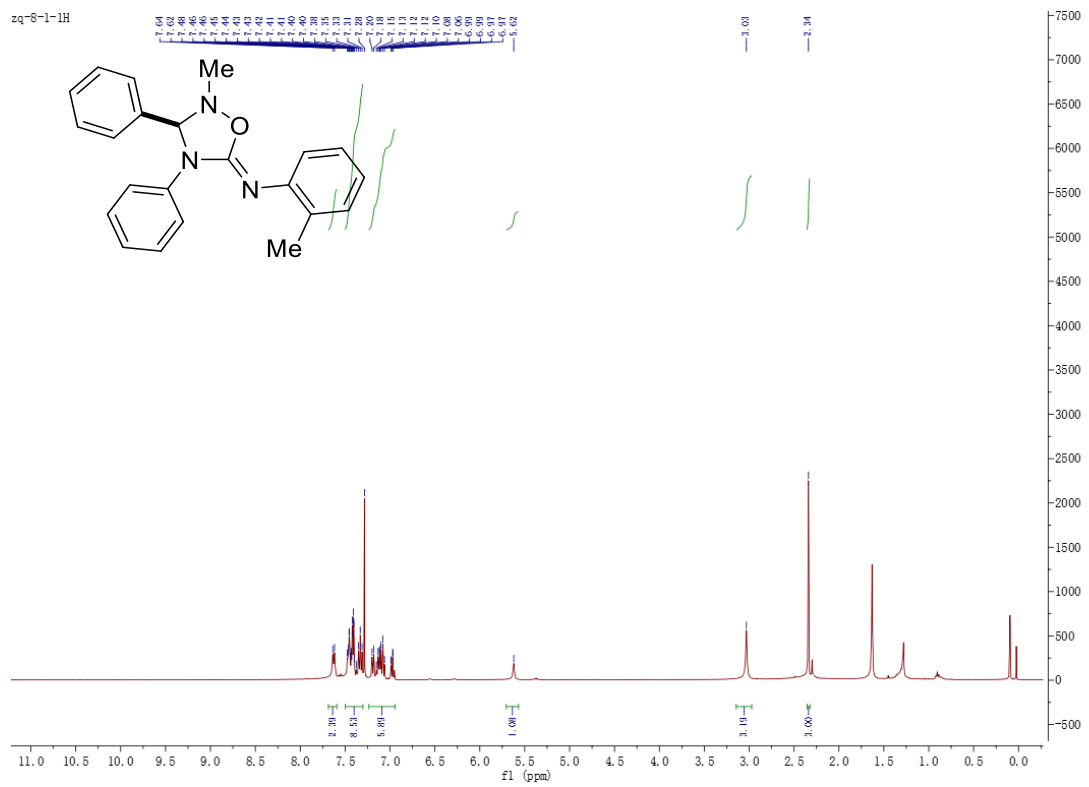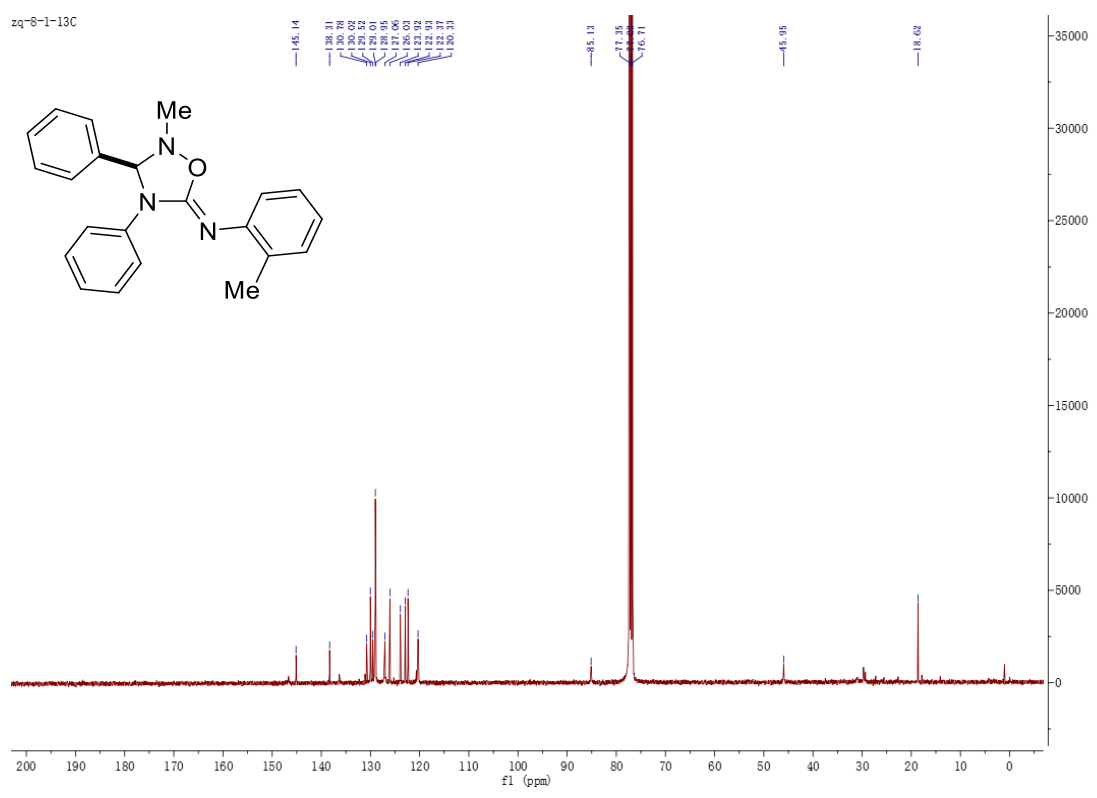



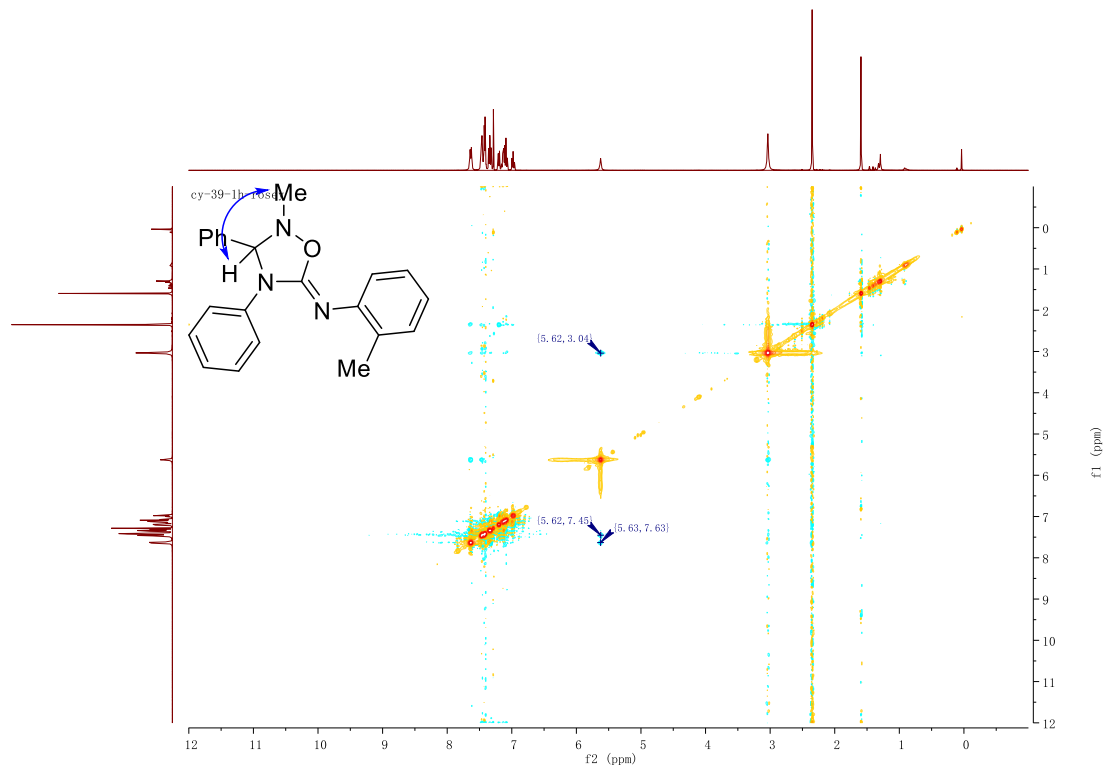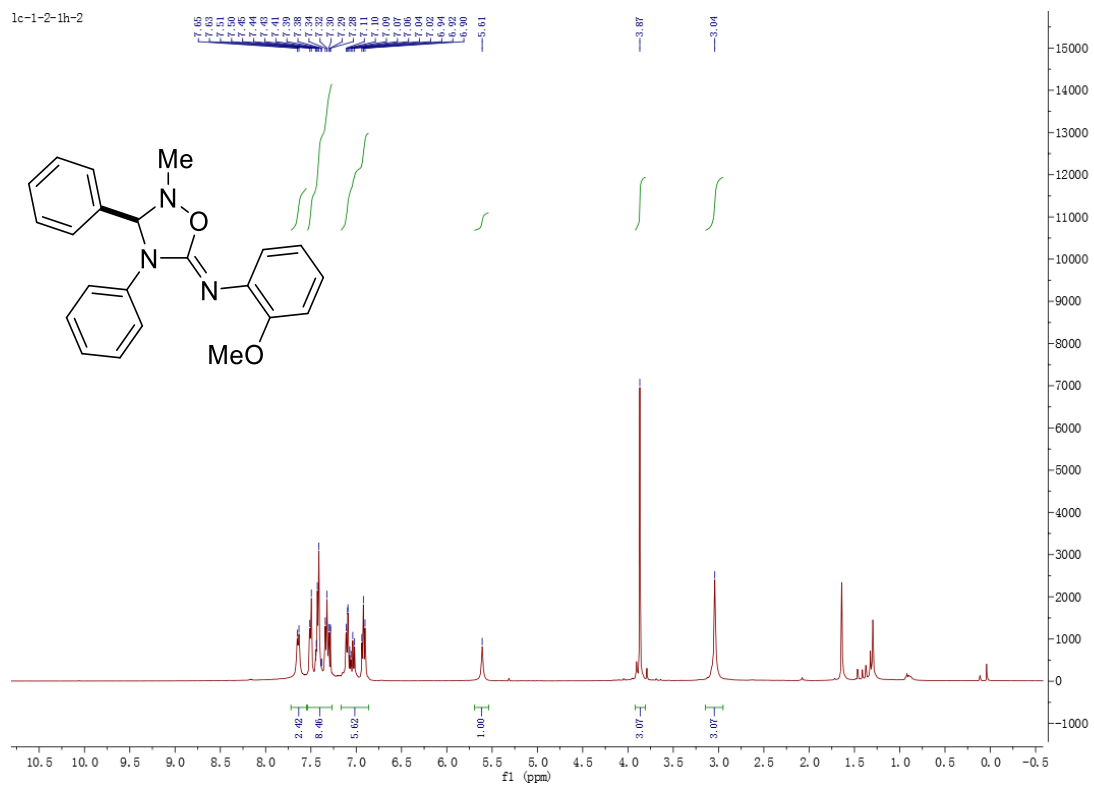

1c-1-2-13c

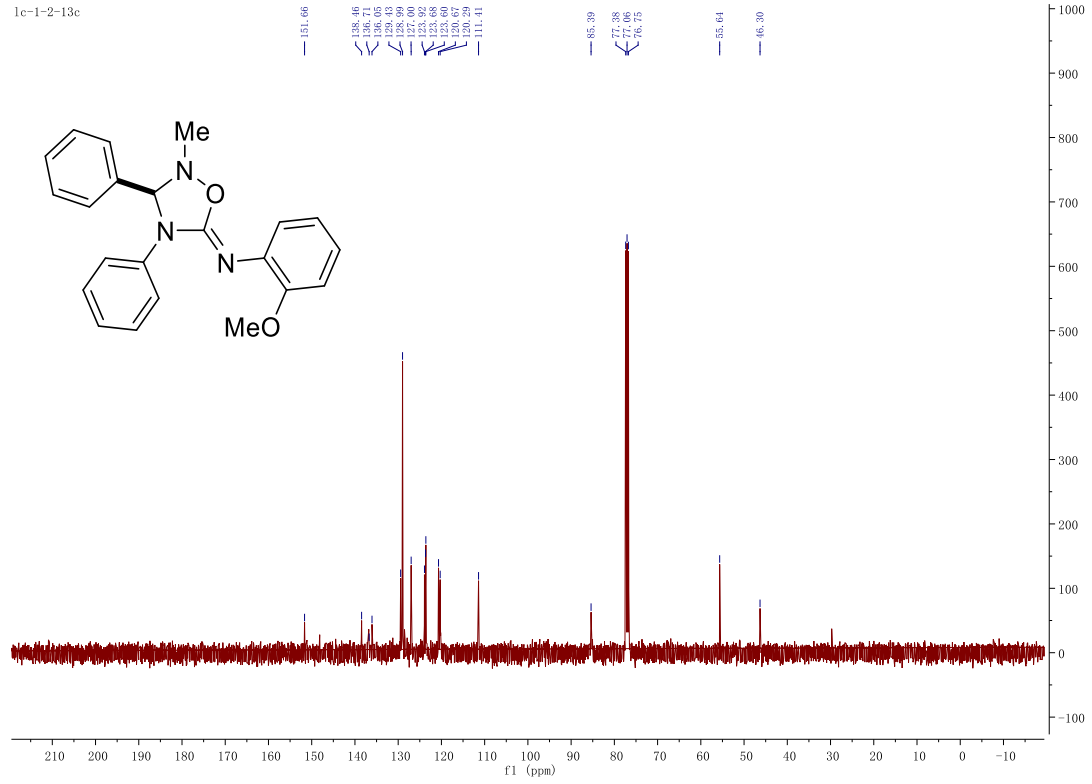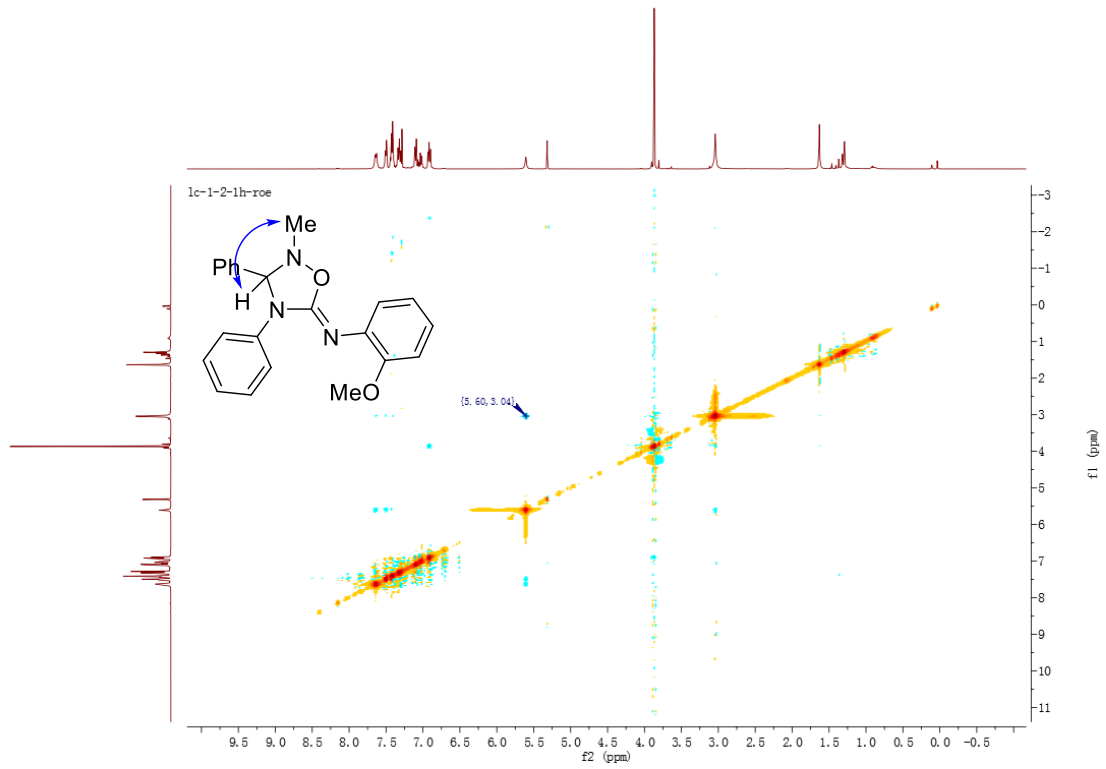

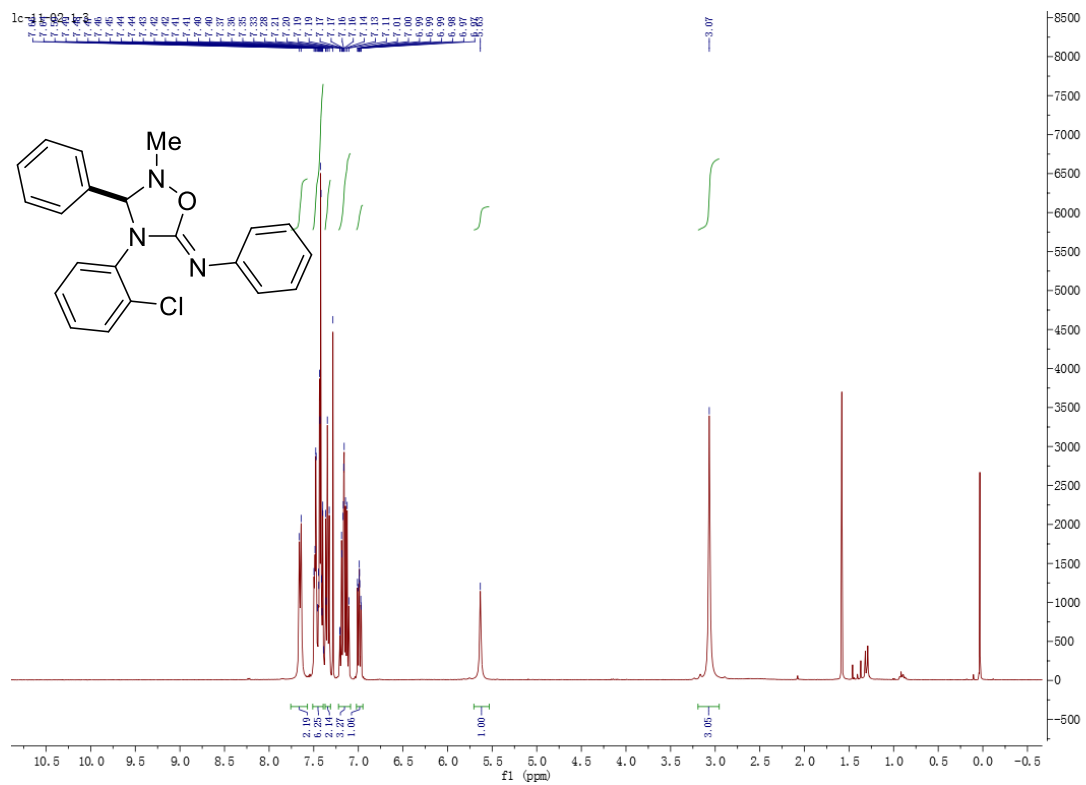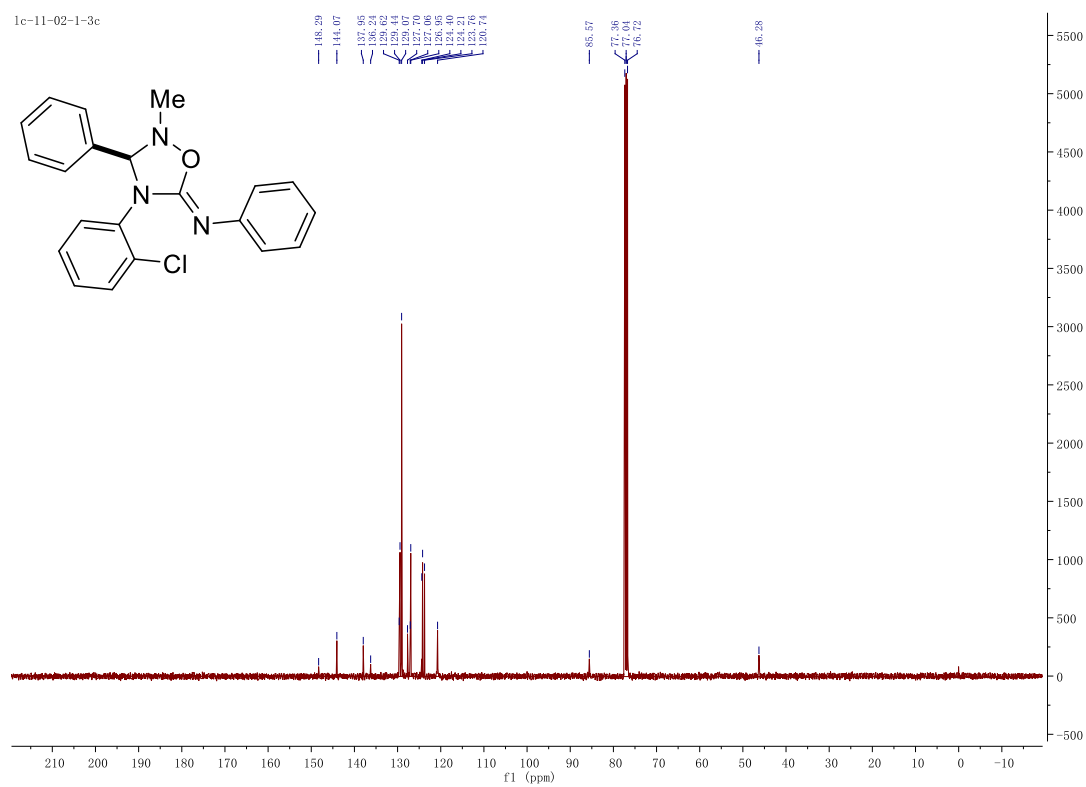



1c-2-1h

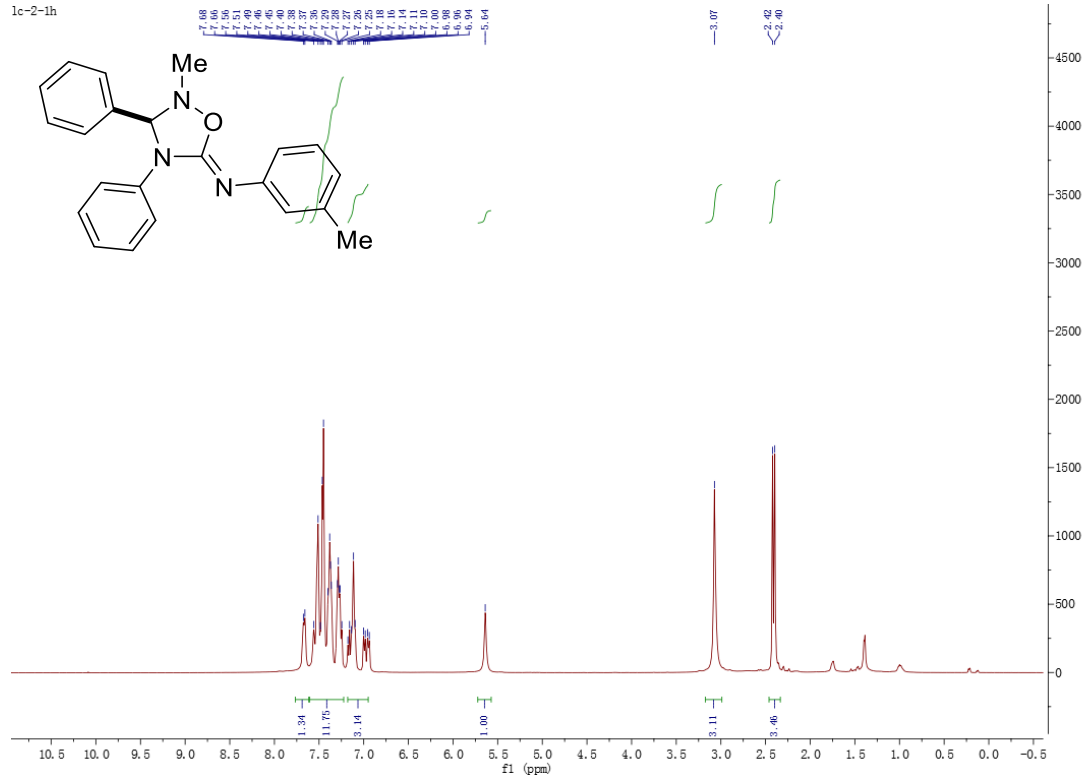

1c-2-13C

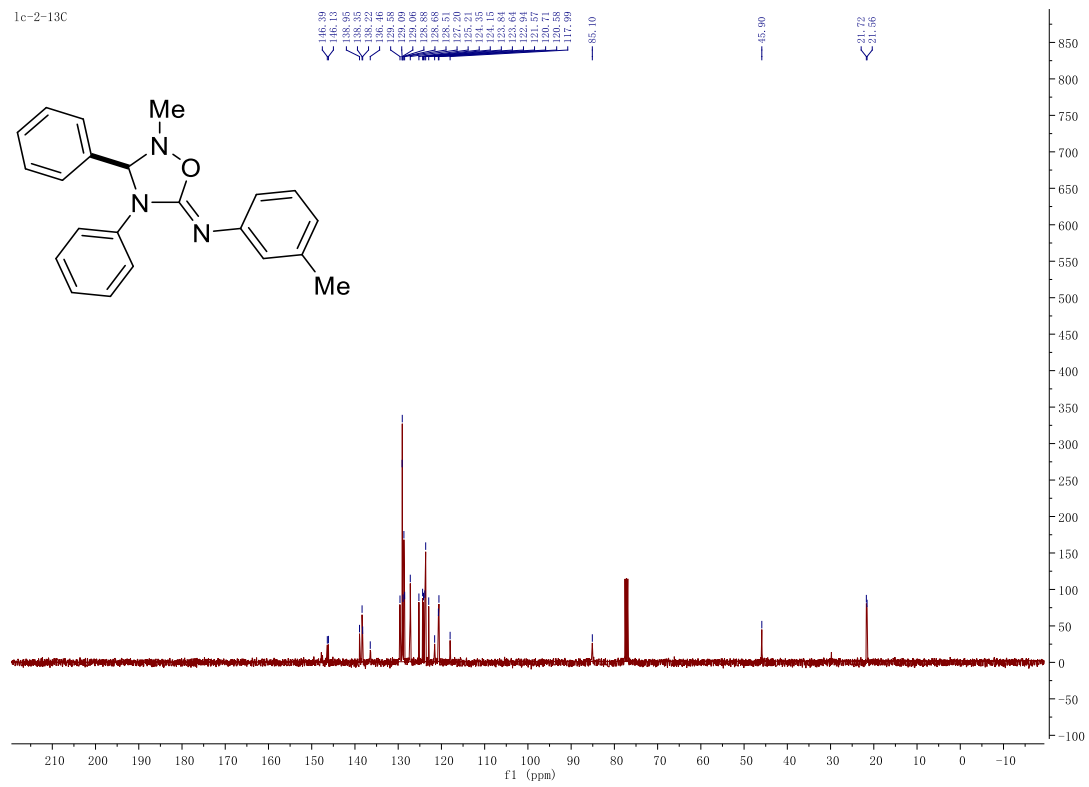



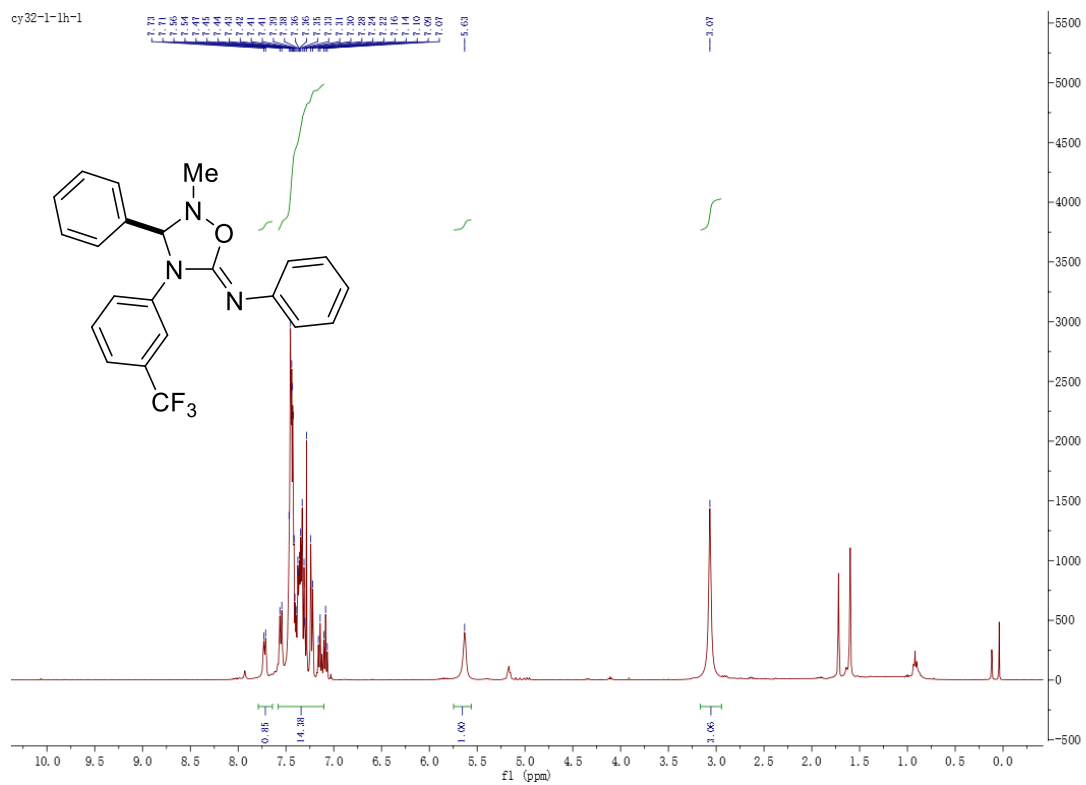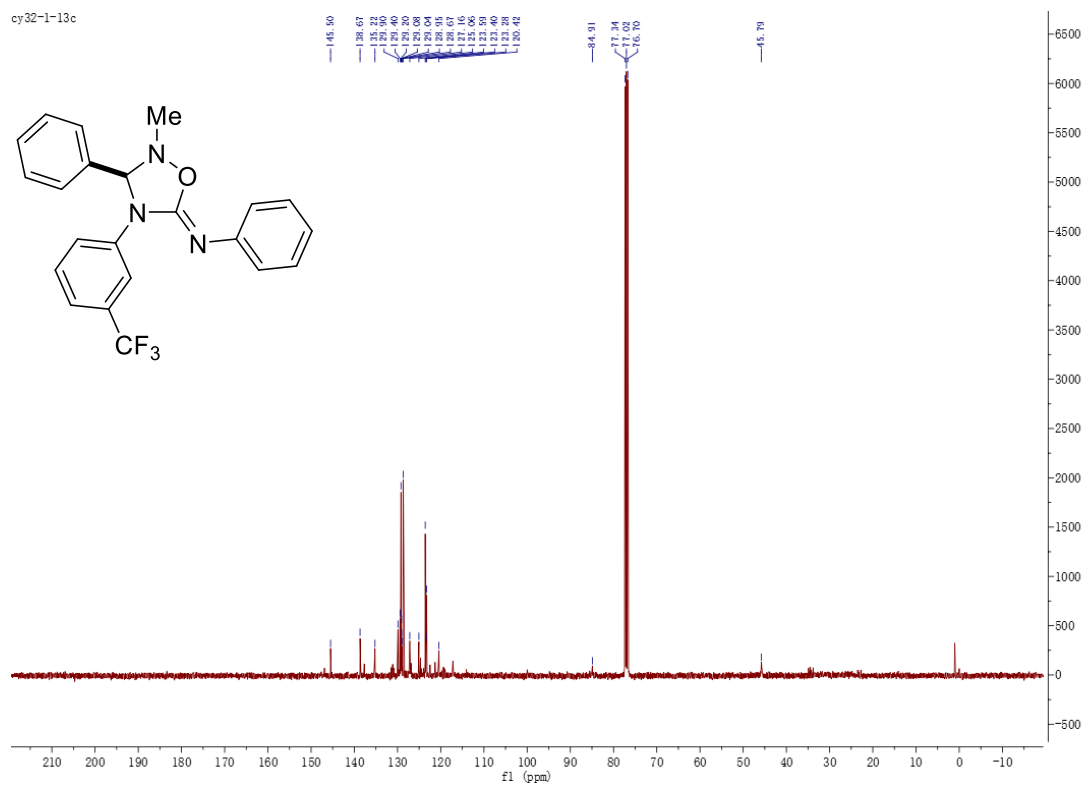

1c-3-1h

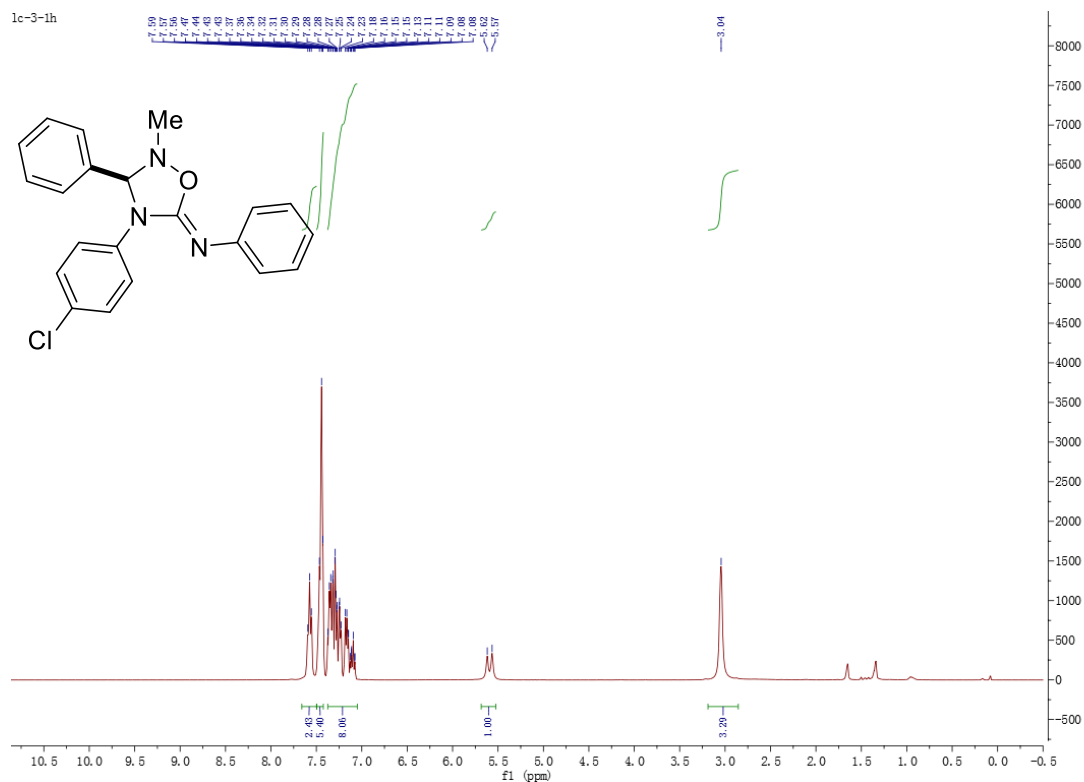

1c-3-13c

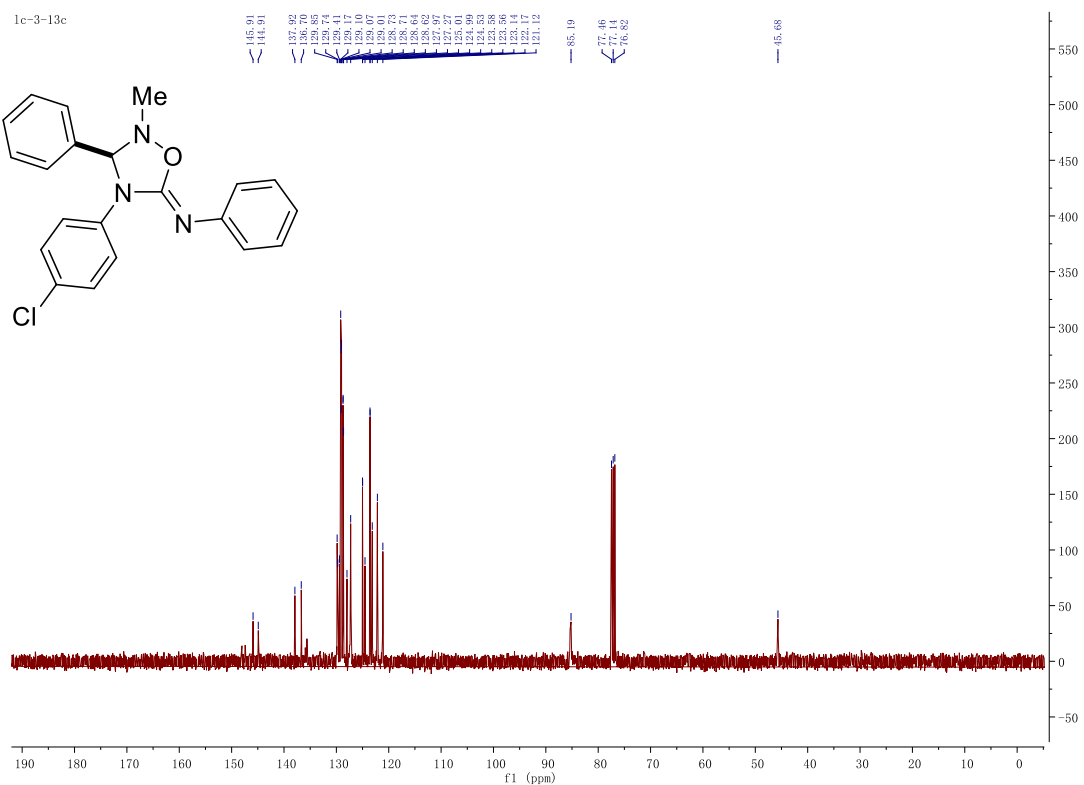



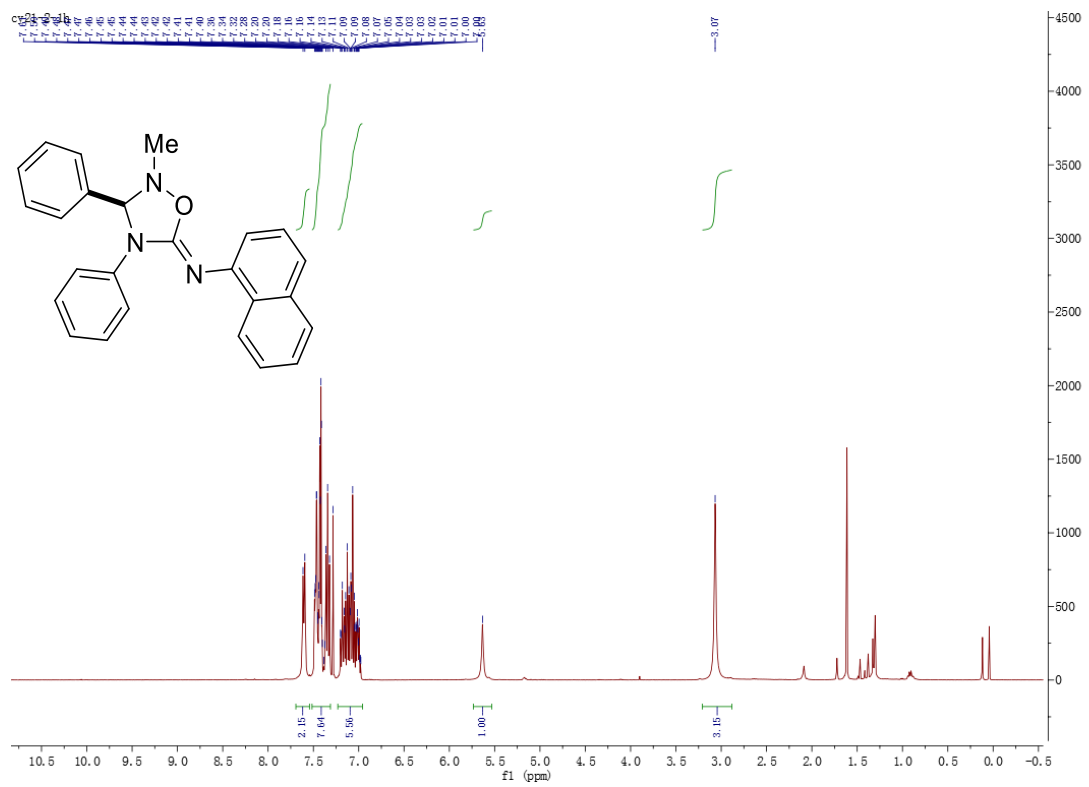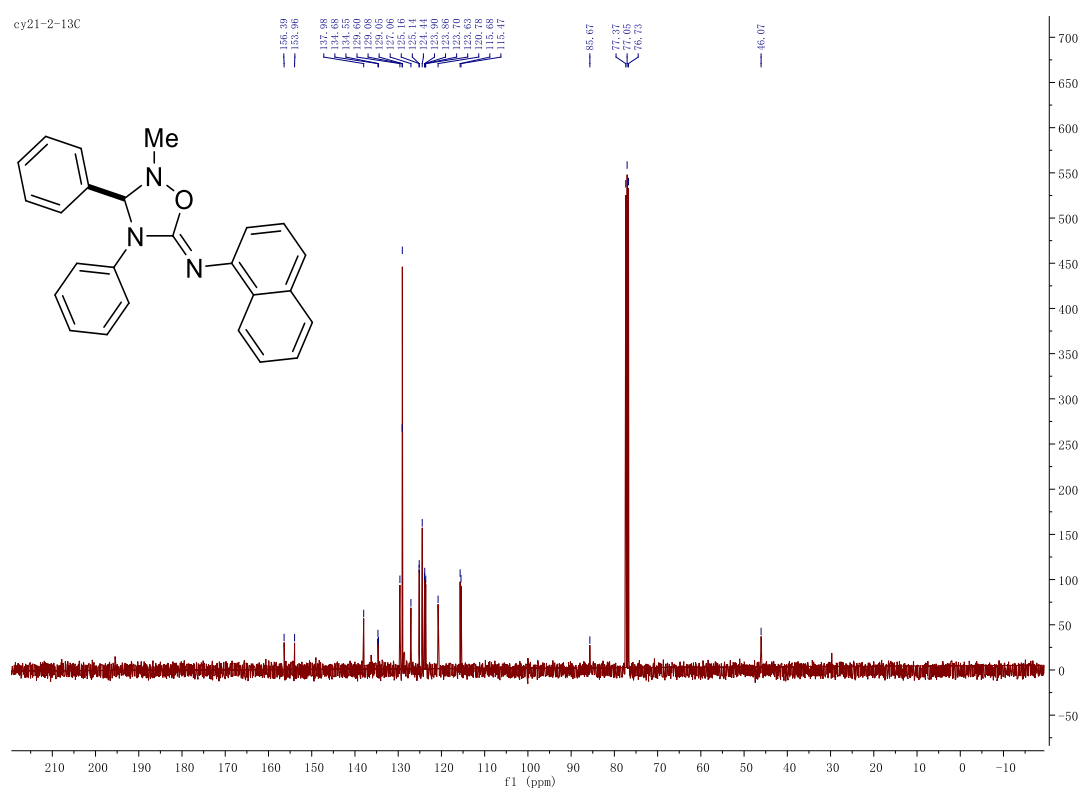

cy29-1-1h

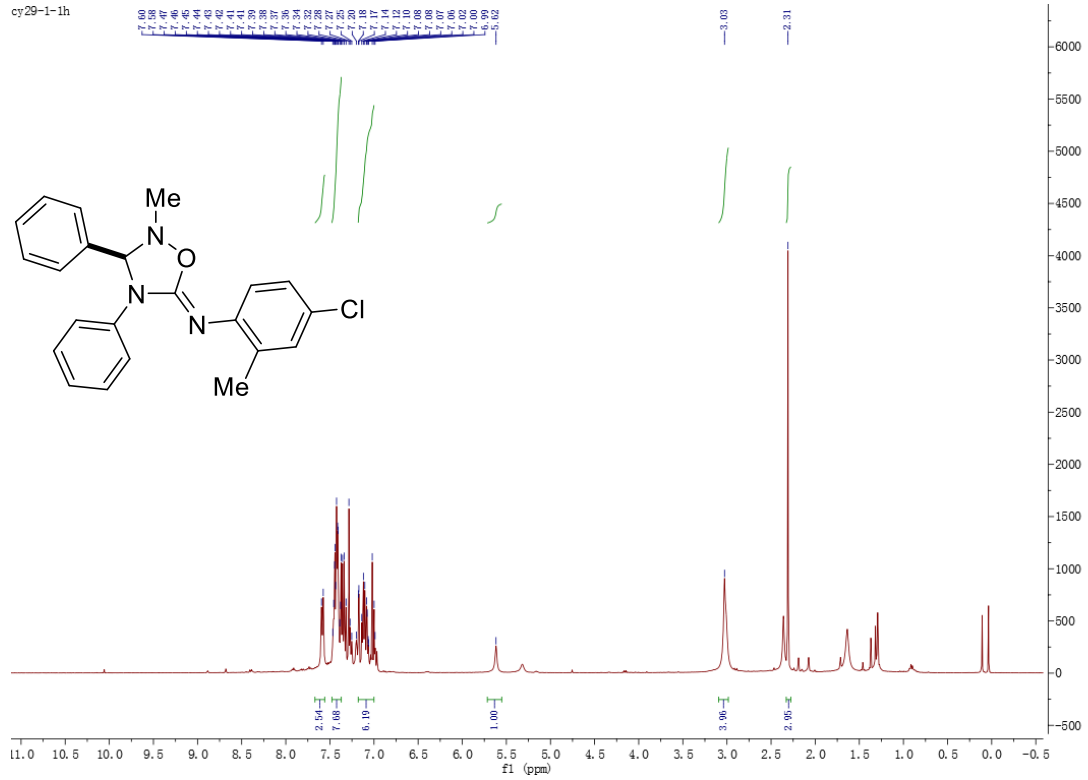

cy29-1-13c

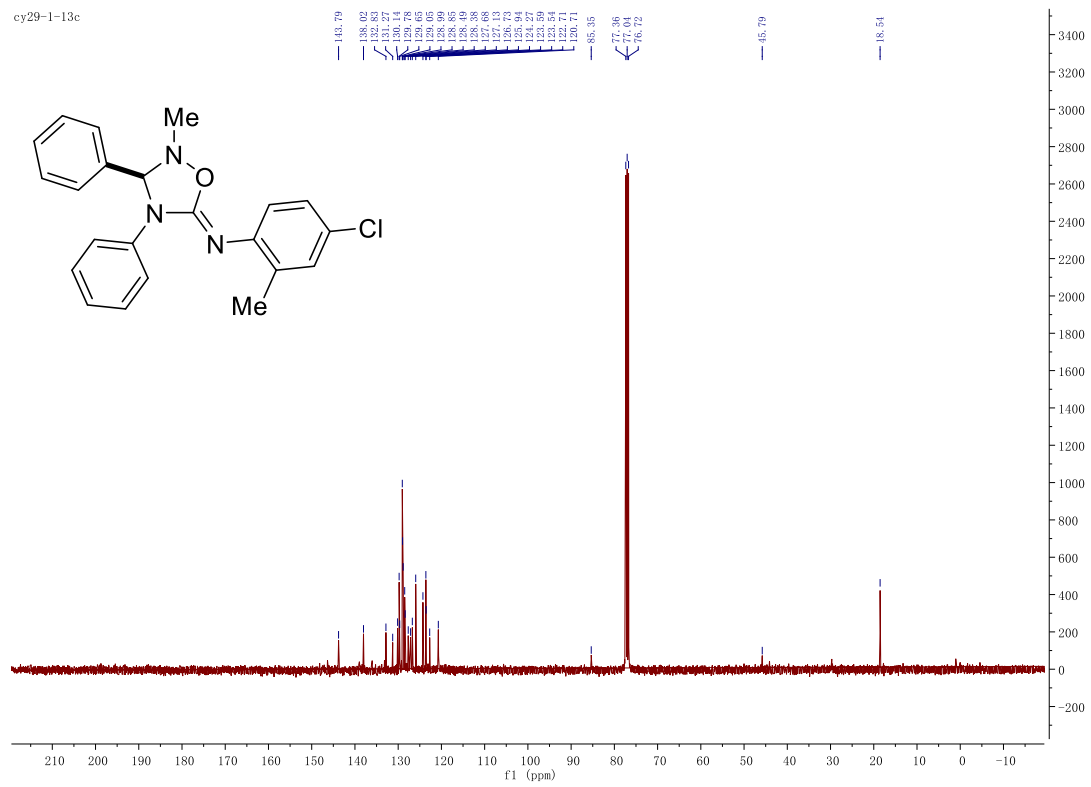

ZQ-7-1-1H

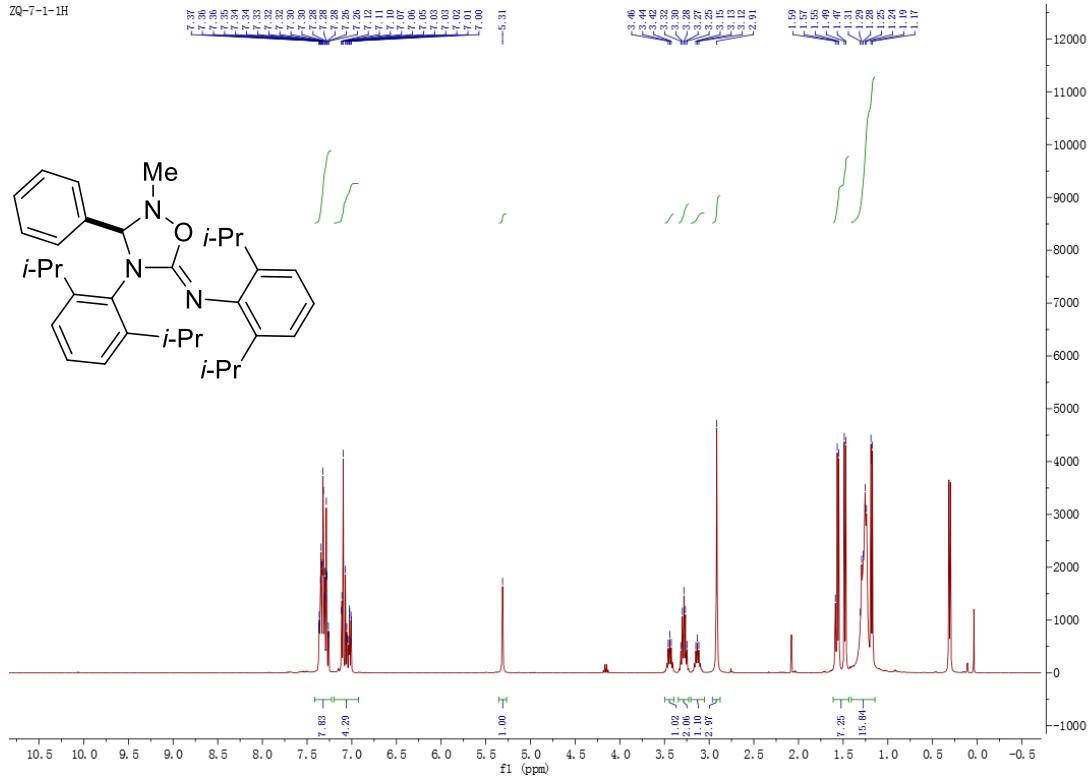

ZQ-7-1-13C

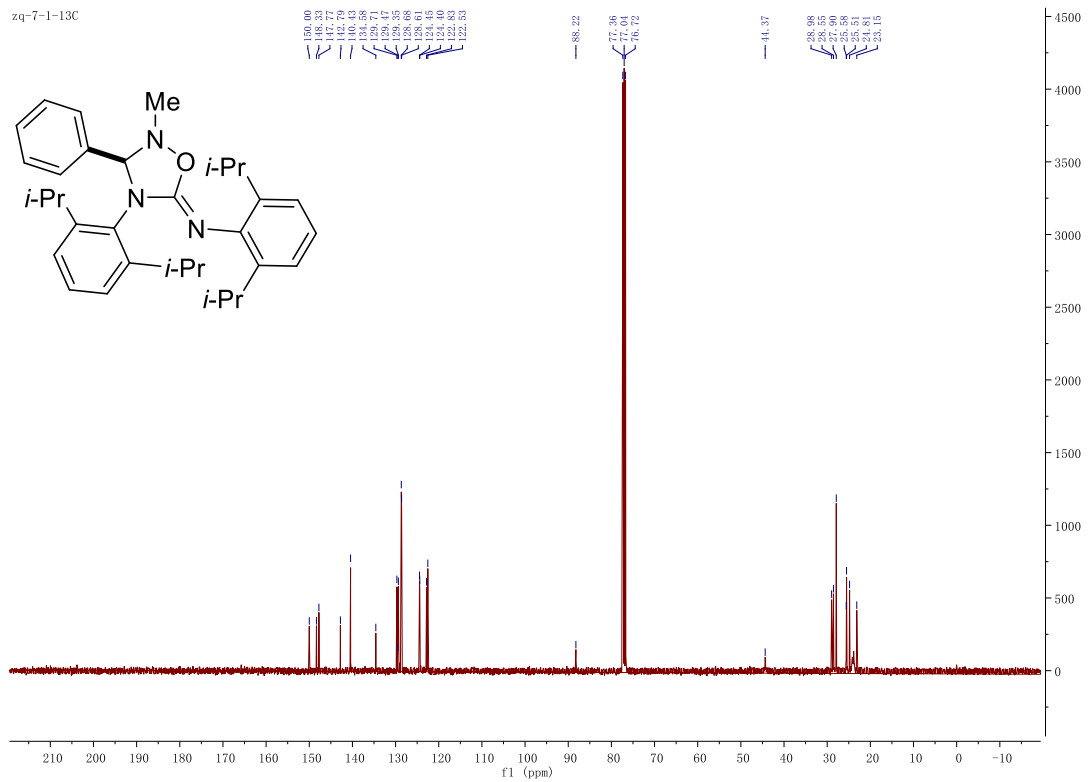

5 X-Ray diffraction of

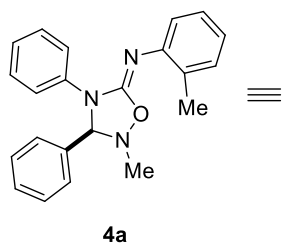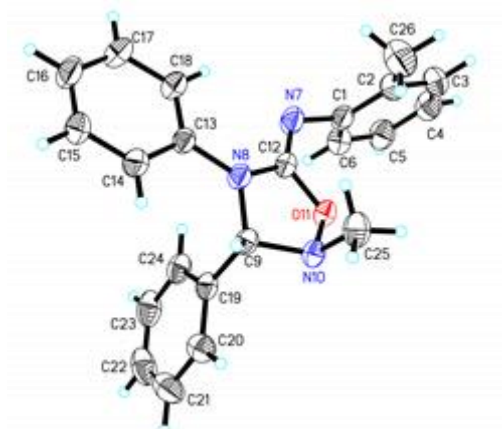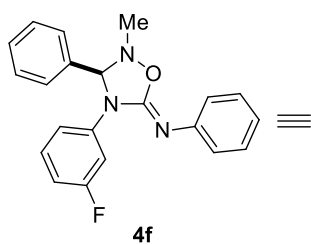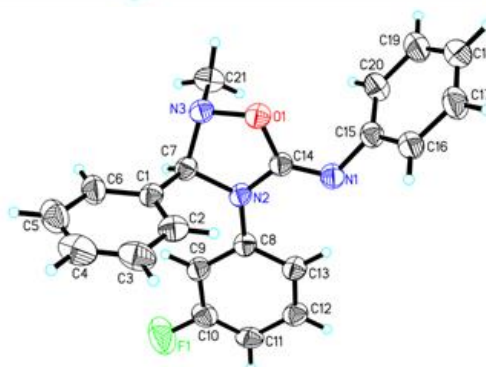

Supplement: c9nj00030e1.pdf [file c9nj00030e1.pdf]
